# Supplementary material
Source: ML conference proceedings conference paper supplement (https://openreview.net/forum?id=0PtUPB9z6qK)
Supplement: supplementary_material [file attachment]

# GENERALIZED ENERGY BASED MODELS

Anonymous authors

Paper under double-blind review

## ABSTRACT

We introduce the Generalized Energy Based Model (GEBM) for generative modelling. These models combine two trained components: a base distribution (generally an implicit model), which can learn the support of data with low intrinsic dimension in a high dimensional space; and an energy function, to refine the probability mass on the learned support. Both the energy function and base jointly constitute the final model, unlike GANs, which retain only the base distribution (the "generator"). GEBMs are trained by alternating between learning the energy and the base. We show that both training stages are well-defined: the energy is learned by maximising a generalized likelihood, and the resulting energy-based loss provides informative gradients for learning the base. Samples from the posterior on the latent space of the trained model can be obtained via MCMC, thus finding regions in this space that produce better quality samples. Empirically, the GEBM samples on image-generation tasks are of much better quality than those from the learned generator alone, indicating that all else being equal, the GEBM will outperform a GAN of the same complexity. When using normalizing flows as base measures, GEBMs succeed on density modelling tasks, returning comparable performance to direct maximum likelihood of the same networks.

## 1 INTRODUCTION

Energy-based models (EBMs) have a long history in physics, statistics and machine learning (LeCun et al., 2006). They belong to the class of *explicit* models and can be described by a family of energies  $E$  which define probability distributions with density proportional to  $\exp(-E)$ . Those models are often known up to a normalizing constant  $Z(E)$ , also called the *partition function*. The learning task then consists of finding an optimal function that best describes a given system or target distribution  $\mathbb{P}$ . This can be achieved using maximum likelihood estimation (MLE); however, the intractability of the normalizing partition function makes this learning task challenging. Thus, various methods have been proposed to circumvent this (Hinton, 2002; Hyvärinen, 2005; Gutmann and Hyvärinen, 2012; Dai et al., 2019a;b). All these methods estimate EBMs that are supported over the whole space. In many applications, however,  $\mathbb{P}$  is believed to be supported on an unknown lower dimensional manifold. This happens in particular when there are strong dependences between variables in the data and suggests incorporating a low-dimensionality hypothesis in the model.

Generative Adversarial Networks (GANs) (Goodfellow et al., 2014) are a particular way to enforce low dimensional structure in a model. They rely on an *implicit* model, the generator, to produce samples supported on a low-dimensional manifold by mapping a pre-defined latent noise to the sample space using a trained function. GANs have been very successful in generating high-quality samples on various tasks, especially for unsupervised image generation (Brock et al., 2018). The generator is trained *adversarially* against a discriminator network whose goal is to distinguish samples produced by the generator from the target data. This has inspired further research to extend the training procedure to more general losses (Nowozin et al., 2016; Arjovsky et al., 2017; Li et al., 2017; Bińkowski et al., 2018; Arbel et al., 2018) and to improve its stability (Miyato et al., 2018; Gulrajani et al., 2017; Nagarajan and Kolter, 2017; Kodali et al., 2017). While the generator of a GAN has effectively a low-dimensional support, it remains challenging to refine the distribution of mass on that support using pre-defined latent noise. For instance, as shown by Cornish et al. (2020) for normalizing flows, when the latent distribution is unimodal and the target distribution possesses multiple disconnected low-dimensional components, the generator, as a continuous map, compensates for this mismatch using steeper slopes. In practice, this implies the need for more complicated generators.

In the present work, we propose a new class of models, called *Generalized Energy Based Models* (GEBMs), which can represent distributions supported on low-dimensional manifolds while offering more flexibility in refining the mass on those manifolds. GEBMs combine the strength of both *implicit* and *explicit* models in two separate components: a base distribution (often chosen to be an implicit model) which learns the low-dimensional support of the data, and an energy function that can refine the probability mass on that learned support. We propose to train the GEBM by alternating between learning the energy and the base, analogous to  $f$ -GAN training (Goodfellow et al., 2014; Nowozin et al., 2016). The energy is learned by maximizing a generalized notion of likelihood which we relate to the *Donsker-Varadhan* lower-bound (Donsker and Varadhan, 1975) and *Fenchel duality*, as in (Nguyen et al., 2010; Nowozin et al., 2016). Although the partition function is intractable in general, we propose a method to learn it in an amortized fashion without introducing additional surrogate models, as done in variational inference (Kingma and Welling, 2014; Rezende et al., 2014) or by Dai et al. (2019a;b). The resulting maximum likelihood estimate, the *KL Approximate Lower-bound Estimate* (KALE), is then used as a loss for training the base. When the class of energies is rich and smooth enough, we show that KALE leads to a meaningful criterion for measuring weak convergence of probabilities. Following recent work by Chu et al. (2020); Sanjabi et al. (2018), we show that KALE possesses well defined gradients w.r.t. the parameters of the base, ensuring well-behaved training. We also provide convergence rates for the empirical estimator of KALE when the variational family is sufficiently well behaved, which may be of independent interest.

The main advantage of GEBMs becomes clear when sampling from these models: the posterior over the latents of the base distribution incorporates the learned energy, putting greater mass on regions in this latent space that lead to better quality samples. Sampling from the GEBM can thus be achieved by first sampling from the posterior distribution of the latents via MCMC in the low-dimensional latent space, then mapping those latents to the input space using the implicit map of the base. This is in contrast to standard GANs, where the latents of the base have a fixed distribution. We focus on a class of samplers that exploit gradient information, and show that these samplers enjoy fast convergence properties by leveraging the recent work of Eberle et al. (2017). While there has been recent interest in using the discriminator to improve the quality of the generator during sampling (Azadi et al., 2019; Turner et al., 2019; Neklyudov et al., 2019; Grover et al., 2019; Tanaka, 2019; Wu et al., 2019b), our approach emerges naturally from the model we consider.

We begin in Section 2 by introducing the GEBM model. In Section 3, we describe the learning procedure using KALE, then derive a method for sampling from the learned model in Section 4. In Section 5 we discuss related work. Finally, experimental results are presented in Section 6.

## 2 GENERALIZED ENERGY-BASED MODELS

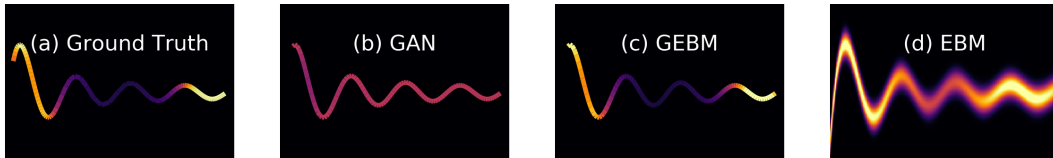

Figure 1: Data generating distribution supported on a line and with higher density at the extremities. Learned models using either a GAN, GEBM, or EBM.

In this section, we introduce generalized energy based models (GEBM), that combine the strengths of both energy-based models and implicit generative models, and admit the first of these as a special case. An **energy-based model** (EBM) is defined by a set  $\mathcal{E}$  of real valued functions called *energies*, where each  $E \in \mathcal{E}$  specifies a probability density over the data space  $\mathcal{X} \subset \mathbb{R}^d$  up to a normalizing constant,

$$\mathbb{Q}(dx) = \exp(-E(x) - A)dx, \quad A = \log\left(\int \exp(-E(x))dx\right). \quad (1)$$

While EBMs have been shown recently to be powerful models for representing complex high dimensional data distributions, they still unavoidably lead to a blurred model whenever data are concentrated on a lower-dimensional manifold. This is the case in Figure 1(a), where the ground truth distribution is

supported on a 1-D line and embedded in a 2-D space. The EBM in Figure 1(d) learns to give higher density to a halo surrounding the data, and thus provides a blurred representation. That is a consequence of EBM having a density defined over the whole space, and can result in blurred samples for image models.

An **implicit generative model** (IGM) is a family of probability distributions  $\mathbb{G}_\theta$  parametrized by a learnable *generator* function  $G : \mathcal{Z} \mapsto \mathcal{X}$  that maps latent samples  $z$  from a fixed latent distribution  $\eta$  to the data space  $\mathcal{X}$ . The latent distribution  $\eta$  is required to have a density over the latent space  $\mathcal{Z}$  and is often easy to sample from. Thus, Sampling from  $\mathbb{G}$  is simply achieved by first sampling  $z$  from  $\eta$  then applying  $G$ ,

$$x \sim \mathbb{G} \iff x = G(z), \quad z \sim \eta. \quad (2)$$

GANs are popular instances of these models, and are trained *adversarially* (Goodfellow et al., 2014). When the latent space  $\mathcal{Z}$  has a smaller dimension than the input space  $\mathcal{X}$ , the IGM will be supported on a lower dimensional manifold of  $\mathcal{X}$ , and thus will not possess a Lebesgue density on  $\mathcal{X}$  (Bottou et al., 2017). IGMs are therefore good candidates for modeling low dimensional distributions. While GANs can accurately learn the low-dimensional support of the data, they can have limited power for representing the distribution of mass on the support. This is illustrated in Figure 1(b).

A **generalized energy-based model** (GEBM)  $\mathbb{Q}$  is defined by a combination of a *base*  $\mathbb{G}$  and an *energy*  $E$  defined over a subset  $\mathcal{X}$  of  $\mathbb{R}^d$ . The **base** component can typically be chosen to be an IGM as in (2). The **generalized energy** component can refine the mass on the support defined by the *base*. It belongs to a class  $\mathcal{E}$  of real valued functions defined on the input space  $\mathcal{X}$ , and represents the negative log-density of a sample from the GEBM with respect to the base  $\mathbb{G}$ ,

$$\mathbb{Q}(\mathrm{d}x) = \exp(-E(x) - A_{\mathbb{G},E}) \mathbb{G}(\mathrm{d}x), \quad A_{\mathbb{G},E} = \log \left( \int \exp(-E(x)) \mathbb{G}(\mathrm{d}x) \right),$$

where  $A_{\mathbb{G},E}$  is the logarithm of the normalizing constant of the model w.r.t.  $\mathbb{G}$ . Thus, a GEBM  $\mathbb{Q}$  re-weights samples from the base according to the un-normalized importance weights  $\exp(-E(x))$ . Using the latent structure of the base  $\mathbb{G}$ , this importance weight can be pulled-back to the latent space to define a *posterior latent* distribution  $\nu$ ,

$$\nu(z) := \eta(z) \exp(-E(G(z)) - A_{\mathbb{G},E}). \quad (3)$$

Hence, the *posterior latent*  $\nu$  can be used instead of the latent noise  $\eta$  for sampling from  $\mathbb{Q}$ , as summarized by Proposition 1, with a proof in Appendix B.1.

**Proposition 1.** *Sampling from  $\mathbb{Q}$  requires sampling a latent  $z$  from  $\nu$  (3) then applying the map  $G$ ,*

$$x \sim \mathbb{Q} \iff x = G(z), \quad z \sim \nu. \quad (4)$$

Therefore, the energy  $E$  allows to distort the prior noise  $\eta$  on the latent space to put more or less mass in specific regions of the manifold defined by the base  $\mathbb{G}$ . Just like IGMs, GEBMs can accurately learn the low-dimensional support of data. They also benefit from the flexibility of EBMs for representing densities using an energy  $E$  to refine distribution of mass on the support defined by  $\mathbb{G}$ , as seen in Figure 1(c). The next proposition shows that EBMs are particular cases of GEBMs, as proved in Appendix B.1.

**Proposition 2.** *Any EBM with energy  $E$  (as in (1)) can be expressed as a GEBM with base  $\mathbb{G}$  given as a normalizing flow with density  $\exp(-r(x))$  and a generalized energy  $\tilde{E}(x) = E(x) - r(x)$ . In this particular case, the dimension of the latent is necessarily equal to the data dimension, i.e.  $\dim(\mathcal{Z}) = \dim(\mathcal{X})$ .*

### 3 LEARNING GEBMS

In this section we describe a general procedure for learning GEBMs. We decompose the learning procedure into two steps: an *energy learning* step and a *base learning* step. The overall learning procedure alternates between these two steps, as done in GAN training (Goodfellow et al., 2014).

#### 3.1 ENERGY LEARNING

When the base  $\mathbb{G}$  is fixed, varying the energy  $E$  leads to a family of models that all admit a density  $\exp(-E - A_{\mathbb{G},E})$  w.r.t.  $\mathbb{G}$ . When the base  $\mathbb{G}$  admits a density  $\exp(-r)$  defined over the whole space, it is possible to learn the energy  $E$  by maximizing the likelihood of the model  $-\int (E + r) \mathrm{d}\mathbb{P} - A_{\mathbb{G},E}$ .

However, in general  $\mathbb{G}$  is supported on a lower-dimensional manifold so that  $r$  is ill-defined and the usual notion of likelihood cannot be used. Instead, we introduce a generalized notion of likelihood which does not require a well defined density  $\exp(-r)$  for  $\mathbb{G}$ :

**Definition 1** (Generalized Likelihood). *The expected  $\mathbb{G}$ -log-likelihood of the model  $\mathbb{Q}_{\mathbb{G},E}$  under a target distribution  $\mathbb{P}$  is defined as:*

$$\mathcal{L}_{\mathbb{P},\mathbb{G}}(E) := - \int E(x) d\mathbb{P}(x) - A_{\mathbb{G},E} \quad (5)$$

When the Kullback-Leibler divergence between  $\mathbb{P}$  and  $\mathbb{G}$  is well defined, (5) corresponds to the Donsker-Varadhan (DV) lower bound on the KL (Donsker and Varadhan, 1975), meaning that  $\text{KL}(\mathbb{P}||\mathbb{G}) \geq \mathcal{L}_{\mathbb{P},\mathbb{G}}(E)$  for all  $E$ , with equality only when  $E$  is the negative log-density ratio of  $\mathbb{P}$  w.r.t.  $\mathbb{G}$ . However, the main purpose for introducing Definition 1 is not to estimate the  $\text{KL}(\mathbb{P}||\mathbb{G})$  which might be infinite when  $\mathbb{P}$  and  $\mathbb{G}$  are mutually singular. Instead, it is used to learn a maximum likelihood energy  $E^*$  by maximizing  $\mathcal{L}_{\mathbb{P},\mathbb{G}}(E)$  w.r.t.  $E$ . Such an optimal solution is well defined whenever the set of energies is suitably constrained. This is the case if the energies are parametrized by a compact set  $\Psi$  with  $\psi \mapsto E_\psi$  continuous over  $\Psi$ .

**Estimating the likelihood** is achieved using i.i.d. samples  $(X_n)_{1:N}, (Y_m)_{1:M}$  from  $\mathbb{P}$  and  $\mathbb{G}$ :

$$\hat{\mathcal{L}}_{\mathbb{P},\mathbb{G}}(E) = -\frac{1}{N} \sum_{n=1}^N E(X_n) - \log \left( \frac{1}{M} \sum_{m=1}^M \exp(-E(Y_m)) \right). \quad (6)$$

In the context of mini-batch stochastic gradient methods, however,  $M$  typically ranges from 10 to 1000, which can lead to a poor estimate for the log-partition function  $A_{\mathbb{G},E}$ . Moreover, (6) doesn't exploit estimates of  $A_{\mathbb{G},E}$  from previous gradient iterations. Instead, we propose an estimator which introduces a variational parameter  $A \in \mathbb{R}$  meant to estimate  $A_{\mathbb{G},E}$  in an amortized fashion. The key idea is to exploit the convexity of the exponential which directly implies  $-A_{\mathbb{G},E} \geq -A - \exp(-A + A_{\mathbb{G},E}) + 1$  for any  $A \in \mathbb{R}$ , with equality only when  $A = A_{\mathbb{G},E}$ . Therefore, (5) admits a lower-bound of the form:

$$\mathcal{L}_{\mathbb{P},\mathbb{G}}(E) \geq - \int (E+A) d\mathbb{P} - \int \exp(-(E+A)) d\mathbb{G} + 1 := \mathcal{F}_{\mathbb{P},\mathbb{G}}(E+A),$$

where we introduced the functional  $\mathcal{F}_{\mathbb{P},\mathbb{G}}$  for concision. Maximizing  $\mathcal{F}_{\mathbb{P},\mathbb{G}}(E+A)$  over  $A$  recovers the likelihood  $\mathcal{L}_{\mathbb{P},\mathbb{G}}(E)$ . Moreover, jointly maximizing over  $E$  and  $A$  yields the maximum likelihood energy  $E^*$  and its corresponding log-partition function  $A^* = A_{\mathbb{G},E^*}$ . This optimization is well-suited for stochastic gradient methods using the following estimator:

$$\hat{\mathcal{F}}_{\mathbb{P},\mathbb{G}}(E+A) = -\frac{1}{N} \sum_{n=1}^N (E(X_n) + A) - \frac{1}{M} \sum_{m=1}^M \exp(-(E(Y_m) + A)) + 1. \quad (7)$$

### 3.2 BASE LEARNING

Unlike in Section 3.1, varying the base  $\mathbb{G}$  does not need to preserve the same support. Thus, it is generally not possible to use maximum likelihood methods for learning  $\mathbb{G}$ . Instead, we propose to use the generalized likelihood (5) evaluated at the optimal energy  $E^*$  as a meaningful loss for learning  $\mathbb{G}$ , and refer to it as the *KL Approximate Lower-bound Estimate* (KALE),

$$\text{KALE}(\mathbb{P}||\mathbb{G}) = \sup_{(E,A) \in \mathcal{E} \times \mathbb{R}} \mathcal{F}_{\mathbb{P},\mathbb{G}}(E+A). \quad (8)$$

From Section 3.1,  $\text{KALE}(\mathbb{P}||\mathbb{G})$  is always a lower bound on  $\text{KL}(\mathbb{P},\mathbb{G})$ . The bound becomes tight whenever the negative log density of  $\mathbb{P}$  w.r.t.  $\mathbb{G}$  is well-defined and belongs to  $\mathcal{E}$  (Appendix A). Moreover, Proposition 3 shows that KALE is a reliable criterion for measuring convergence and is a consequence of (Zhang et al., 2017, Theorem B.1) with a proof in Appendix B.2.1:

**Proposition 3.** *Assume all energies in  $\mathcal{E}$  are  $L$ -Lipschitz and that any continuous function can be well approximated by linear combinations of energies in  $\mathcal{E}$  (Assumptions (A) and (B) of Appendix B.2), then  $\text{KALE}(\mathbb{P}||\mathbb{G}) \geq 0$  with equality only if  $\mathbb{P} = \mathbb{G}$  and  $\text{KALE}(\mathbb{P}||\mathbb{G}^n) \rightarrow 0$  iff  $\mathbb{G}^n \rightarrow \mathbb{P}$  in distribution.*

The universal approximation assumption holds in particular when  $\mathcal{E}$  contains feedforward networks. In fact networks with a single neuron are enough, as shown in (Zhang et al., 2017, Theorem 2.3). The

Lipschitz assumption holds when additional regularization of the energy is enforced during training by methods such as **spectral normalization** (Miyato et al., 2018) or additional regularization  $I(\psi)$  on the energy  $E_\psi$  such as the **gradient penalty** (Gulrajani et al., 2017) as done in Section 6.

**Estimating KALE.** According to Arora et al. (2017), accurate finite sample estimates of divergences that result from an optimization procedures (such as in (8)) depend on the richness of the class  $\mathcal{E}$ ; and richer energy classes can result in slower convergence. Unlike divergences such as Jensen-Shannon, KL and the Wasserstein distance, which result from optimizing over a non-parametric and rich class of functions, KALE is restricted to a class of parametric energies  $E_\psi$ . Thus, (Arora et al., 2017, Theorem 3.1) applies, and guarantees good finite sample estimates, provided optimization is solved accurately. In Appendix C, we provide an analysis to the more general case where energies are not necessarily parametric but satisfy some further smoothness properties; we emphasize that our rates do not require the strong assumption that the density ratio is bounded above and below as in Nguyen et al. (2010).

**Smoothness of KALE.** Learning the base is achieved by minimizing  $\mathcal{K}(\theta) := \text{KALE}(\mathbb{P} || \mathbb{G}_\theta)$  over the set of parameters  $\Theta$  of the generator  $G_\theta$ . This requires  $\mathcal{K}(\theta)$  to be smooth enough so that gradient methods converge to local minima and avoid instabilities during training (Chu et al., 2020). Ensuring smoothness of losses that result from an optimization procedure, as in (8), can be challenging. Results for the regularized Wasserstein are provided by Sanjabi et al. (2018), while more general losses are considered by Chu et al. (2020), albeit under stronger conditions for our setting. Theorem 4 shows that when  $E$ ,  $G_\theta$  and their gradients are all lipschitz then  $\mathcal{K}(\theta)$  is smooth enough. We provide a proof for Theorem 4 in Appendix B.2.1.

---

#### Algorithm 1 Training GEBM

---

```

1: Input  $\mathbb{P}, N, M, n_b, n_e$ 
2: Output Trained generator  $G_\theta$  and energy  $E_\psi$ .
3: Initialize  $\theta, \psi$  and  $A$ .
4: for  $k = 1, \dots, n_b$  do
5:   for  $j = 1, \dots, n_e$  do
6:     Sample  $\{X_n\}_{1:N} \sim \mathbb{P}$  and  $\{Y_n\}_{1:N} \sim \mathbb{G}_\theta$ 
7:      $g_\psi \leftarrow -\nabla_\psi \hat{\mathcal{F}}_{\mathbb{P}, \mathbb{G}_\theta}(E_\psi + A) + I(\psi)$ 
8:      $\tilde{A} \leftarrow \log\left(\frac{1}{M} \sum_{m=1}^M \exp(-E_\psi(Y_m))\right)$ 
9:      $g_A \leftarrow \exp(A - \tilde{A}) - 1$ 
10:    Update  $\psi$  and  $A$  using  $g_\psi$  and  $g_A$ .
11:   end for
12:   Set  $\hat{E}^* \leftarrow E_\psi$  and  $\hat{A}^* \leftarrow A$ .
13:   Sample  $\{Z_m\}_{1:M} \sim \eta$ 
14:   Update  $\theta$  using  $\nabla \mathcal{K}(\theta)$  from (10)
15: end for
```

---

**Theorem 4.** Under Assumptions (I) to (III) of Appendix B.2, sub-gradient methods on  $\mathcal{K}$  converge to local optima. Moreover,  $\mathcal{K}$  is lipschitz and differentiable for almost all  $\theta \in \Theta$  with:

$$\nabla \mathcal{K}(\theta) = \exp(-A_{G_\theta, E^*}) \int \nabla_x E^*(G_\theta(z)) \nabla_\theta G_\theta(z) \exp(-E^*(G_\theta(z))) \eta(z) dz. \quad (9)$$

**Estimating the gradient** in (9) is achieved by first optimizing over  $E_\psi$  and  $A$  using (7) with additional regularization  $I(\psi)$ . The resulting estimators  $\hat{E}^*$  and  $\hat{A}^*$  are plugged-in (10) to estimate  $\nabla \mathcal{K}(\theta)$  using samples  $(Z_m)_{1:M}$  from  $\eta$ . Unlike for learning the energy  $E^*$  which benefits from using the amortized estimator of the log-partition function, we found that using the empirical log-partition for learning the base was more stable. We summarize the training procedure in Algorithm 1 which alternates between learning the energy and the base in a similar fashion to *adversarial training*.

$$\widehat{\nabla \mathcal{K}(\theta)} = \frac{\exp(-\hat{A}^*)}{M} \sum_{m=1}^M \nabla_x \hat{E}^*(G_\theta(Z_m)) \nabla_\theta G_\theta(Z_m) \exp(-\hat{E}^*(G_\theta(Z_m))). \quad (10)$$

## 4 SAMPLING FROM GEBMS

Recall from (4) that a sample  $x$  from  $\mathbb{Q}$  is of the form  $x = G(z)$  with  $z$  sampled from the *posterior latent*  $\nu$  of (3) instead of the prior  $\eta$ . While, sampling from  $\eta$  is often straightforward (for instance if  $\eta$  is a gaussian), sampling from  $\nu$  is generally harder due to dependence of its density on complex functions  $E$  and  $G$ . However, it is possible to use a MCMC methods to sample from  $\nu$  since we have access to its density up to a normalizing constant (3). In particular, we are interested in methods that exploit the gradient of  $\nu$  and consider two classes of samplers: *Overdamped samplers* and *Kinetic samplers*.

**Overdamped samplers** are obtained as a time-discretization of the *Overdamped Langevin dynamics*:

$$dz_t = (\nabla_z \log \eta(z_t) - \nabla_z E(G(z_t))) + \sqrt{2} dw_t, \quad (11)$$

where  $w_t$  is a standard Brownian motion. The simplest sampler arising from (11) is the Unadjusted Langevin Algorithm (ULA):

$$Z_{k+1} = Z_k + \lambda(\nabla_z \log \eta(Z_k) - \nabla_z E(G(Z_k))) + \sqrt{2\lambda} W_{k+1}, \quad Z_0 \sim \eta$$

where  $(W_k)_{k \geq 0}$  are i.i.d. standard gaussians and  $\lambda$  is the step-size. For large  $k$ ,  $Z_k$  is an approximate sample from  $\nu$  (Raginsky et al., 2017, Proposition 3.3). Hence, setting  $X = G(Z_k)$  for a large enough  $k$  provides an approximate sample from the GEBM  $\mathbb{Q}$  as summarized in Algorithm 2 of Appendix F.

**Kinetic samplers** arise from the *Kinetic Langevin dynamics* which introduce a momentum variable:

$$dz_t = v_t dt, \quad dv_t = -\gamma v_t dt + u(\nabla \log \eta(z_t) - \nabla E(G(z_t))) dt + \sqrt{2\gamma u} dw_t. \quad (12)$$

with friction coefficient  $\gamma \geq 0$ , inverse mass  $u \geq 0$ , **momentum** vector  $v_t$  and standard Brownian motion  $w_t$ . When the mass  $u^{-1}$  becomes negligible compared to the friction coefficient  $\gamma$ , i.e.: ( $u\gamma^{-2} \approx 0$ ), standard results show that (12) recovers the Overdamped dynamics (11). Discretization in time of (12) leads to Kinetic samplers similar to Hamiltonian Monte Carlo (Cheng et al., 2017; Sachs et al., 2017). We consider a particular algorithm from Sachs et al. (2017) which we call Kinetic Langevin Algorithm (KLA) (see Algorithm 3 in Appendix F). Kinetic samplers were shown to better explore the modes of the invariant distribution  $\nu$  compared to Overdamped ones (see (Neal, 2010; Betancourt et al., 2017) for empirical results and (Cheng et al., 2017) for theory) and also confirmed empirically in Appendix D for image generation tasks using GEBMs. We conclude with a convergence result for Kinetic samplers in the continuous-time limit

**Proposition 5.** Assume that  $\log \eta(z)$  is strongly concave and has a Lipschitz gradient, that  $E$ ,  $G$  and their gradients are all  $L$ -Lipschitz. Set  $x_t = G(z_t)$ , where  $z_t$  is given by (12) and call  $\mathbb{P}_t$  the probability distribution of  $x_t$ . Then  $\mathbb{P}_t$  converges to  $\mathbb{Q}$  in the Wasserstein sense,

$$W_2(\mathbb{P}_t, \mathbb{Q}) \leq LCe^{-c\gamma t}.$$

where  $c$  and  $C$  are positive constants independent of  $t$ , with  $c = O(\exp(-\dim(\mathcal{Z})))$ .

Proposition 5 is proved in Appendix B.1 using (Eberle et al., 2017, Corollary 2.6), and implies that  $(x_t)_{t \geq 0}$  converges at the same speed as  $(z_t)_{t \geq 0}$ . When the dimension  $q$  of  $\mathcal{Z}$  is orders of magnitude smaller than the input space dimension  $d$ , the process  $(x_t)_{t \geq 0}$  converges faster than typical sampling methods on  $\mathcal{X}$ , for which the exponent controlling the convergence rate is of order  $O(\exp(-d))$ .

## 5 RELATED WORK

**Energy based models.** Usually, energy based models are required to have a density w.r.t. to a Lebesgue measure, and do not use a learnable base measure; in other words, models are supported on the whole space. Various methods have been proposed in the literature to learn EBMs. *Contrastive Divergence* (Hinton, 2002) approximates the gradient of the log-likelihood by sampling from the energy model with Markov Chain Monte Carlo. More recently, Du and Mordatch (2019) extend the idea using more sophisticated sampling strategies that lead to higher quality estimators. *Score Matching* (Hyvärinen, 2005) calculates an alternative objective (the *score*) to the log-likelihood which is independent of the partition function, and was recently used in the context non-parametric energy functions to provide estimators of the energy that are provably consistent (Sriperumbudur et al., 2017; Sutherland et al., 2018; Arbel and Gretton, 2018; Wenliang et al., 2019). In *Noise-Contrastive Estimation* (Gutmann and Hyvärinen, 2012), a classifier is trained to distinguish between samples from a fixed proposal distribution and the target  $\mathbb{P}$ . This provides an estimate for the density ratio between the optimal energy model and the proposal distribution. In a similar spirit, Cranmer et al. (2016) uses a classifier to learn likelihood ratios. Conversely, Grathwohl et al. (2020) interprets the logits of a classifier as an energy model obtained after marginalization over the classes. The resulting model is then trained using Contrastive Divergence. In more recent work, Dai et al. (2019a;b) exploit a dual formulation of the logarithm of the partition function as a supremum over the set of all probability distributions of some functional objective. Yu et al. (2020) explore methods for using general f-divergences, such as Jensen-Shannon, to train EBMs.

**Generative Adversarial Networks.** Recent work proposes using the discriminator of a trained GAN to improve the generator quality. Rejection sampling (Azadi et al., 2019) and Metropolis-Hastings correction (Turner et al., 2019; Neklyudov et al., 2019) perform sampling directly on the

high-dimensional input space without using gradient information provided by the discriminator. Moreover, the data distribution is assumed to admit a density w.r.t. the generator. Ding et al. (2019) perform sampling on the feature space of some auxiliary pre-trained network; while Lawson et al. (2019) treat the sampling procedure as a model on its own, learned by maximizing the ELBO. In our case, no auxiliary model is needed. The present work samples from the latent noise according to a learned energy model, in contrast to recently considered methods to optimize over the latent space. Wu et al. (2019b;a) optimize the latent noise during training to minimize a measurement error, which is then used to train the generator. In our case, sampling doesn't interfere with training. Tanaka (2019) interpret the discriminator as a deterministic optimal transport map between the generator and the data distribution, which is then used to compute optimized samples from the latent space. This assumes the deterministic transport map exists, however this may not be true in general, and is in contrast to the diffusion-based sampling that we consider.

The closest related approach appears in a study concurrent to the present work (Che et al., 2020), where the authors propose to use Langevin dynamics on the latent space of a GAN generator, but with a different discriminator to ours (derived from the Jensen-Shannon divergence or a Wasserstein-based divergence). Our theory results showing the existence of the loss gradient (Theorem 4), establishing weak convergence of distributions under KALE (Proposition 3), and demonstrating consistency of the KALE estimator (Appendix C) should transfer to the JS and Wasserstein criteria used in that work. Following the appearance of the present work, an alternative approach, based on normalising flows, has been recently proposed to learn both the low-dimensional support of the data and the density on this support (Brehmer and Cranmer, 2020). This approach maximises the explicit likelihood of a data projection onto a learned manifold, and may be considered complementary to our approach.

## 6 EXPERIMENTS

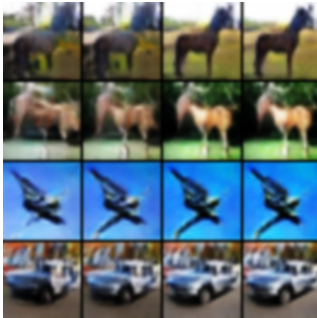

Figure 2: Samples at different iterations of the MCMC chain of Algorithm 3 (left to right).

**Image generation.** We train a GEBM on **unsupervised** image generation tasks, and compare the quality of generated samples with other methods using the FID score Heusel et al. (2017) computed on  $5 \times 10^4$  generated samples. We consider CIFAR-10 Krizhevsky (2009), LSUN Yu et al. (2015), CelebA Liu et al. (2015) and ImageNet Russakovsky et al. (2014) all downsampled to  $32 \times 32$  resolution to reduce computational cost. We use both versions of the SNGAN networks from Miyato et al. (2018) for base and energy, and a 100-dimensional Gaussian for the latent noise  $\eta$ . We train the models for 150000 generator iterations using Algorithm 1. After training is completed, we rescale the energy by  $\beta = 100$  to get a **colder** version of the GEBM and sample from it using either (ULA) Algorithm 2 or (KLA) Algorithm 3 with parameters ( $\gamma = 100, u = 1$ ). This colder temperature leads to an improved FID score, and needs relatively few MCMC iterations, as shown in Figure 6 of Appendix D. Sampler convergence to visually plausible modes at low temperatures is demonstrated in Figure 2. We perform 1000 MCMC iterations with initial step-size of  $\lambda = 10^{-4}$  decreased by 10 every 200 iterations. As a baseline of our method we consider samples generated from the base of the GEBM only (without using information from the energy) and call it KALE-GAN. More details are found in Appendix G.

**Results:** Table 1 shows that GEBM outperforms GAN when using the same networks for the base/generator and energy/critic. KALE-GAN matches the performance of a standard GAN with Jensen-Shannon critic, showing that the improvement of GEBM cannot be explained by the switch from Jensen-Shannon to a KALE-based critic. Rather, the improvement is largely due to incorporating the energy function into the model, and sampling using Algorithm 3.

This finding experimentally validates our claim that incorporating the energy improves the model, and that all else being equal, a GEBM outperforms a GAN with the same generator and critic architecture. Indeed, if the critic is not zero at convergence, then by definition it contains information on the remaining mismatch between the generator and data mass, which the GEBM incorporates, but the GAN does not. The GEBM also outperforms an EBM even when the latter was trained with supervision (S) on ImageNet, which is an easier task (Chen et al. (2019)). More comparisons on Cifar10 and ImageNet are provided in Table 4 of Appendix D.

Table 2 shows different sampling methods using the same trained networks (generator and critic) and with KALE-GAN as a baseline. All energy-exploiting methods outperform the unmodified KALE-GAN with the same architecture. That said, our method outperforms both (IHM) Turner et al. (2019) and (DOT) Tanaka (2019), which both use the energy information.

|          | SNGAN (ConvNet) |          |       | SNGAN (ResNet) |          |       |           |
|----------|-----------------|----------|-------|----------------|----------|-------|-----------|
|          | GEBM            | KALE-GAN | GAN   | GEBM           | KALE-GAN | GAN   | EBM       |
| Cifar10  | 23.02           | 32.03    | 29.9* | <b>19.31</b>   | 20.19    | 21.7  | 38.2      |
| ImageNet | <b>13.94</b>    | 19.37    | 30.66 | 17.33          | 21.00    | 20.50 | 14.31 (S) |

Table 1: FID scores for two versions of SNGAN from Miyato et al. (2018) on Cifar10 and ImageNet. GEBM: training using Algorithm 1 and sampling using Algorithm 3 with ConvNet version for the energy network. KALE-GAN: Only the base of a GEBM is retained for sampling. GAN: training as in Miyato et al. (2018) with  $q = 128$  for the latent dimension as it worked best. EBM: results from Du and Mordatch (2019) with supervised training on ImageNet (S).

Finally, Figures 3 to 5 of Appendix D show that, without decreasing  $\lambda$  and for smaller  $\gamma$ , (KLA) explores different modes/images within the same chain, unlike (ULA). Moving from one mode to another results in an increased FID score while between modes, and can be avoided by decreasing  $\lambda$ .

|            | Cifar10      | LSUN         | CelebA      | ImageNet     |
|------------|--------------|--------------|-------------|--------------|
| KALE-GAN   | 32.03        | 21.67        | 6.91        | 19.37        |
| IHM        | 30.47        | 20.63        | 6.39        | 18.15        |
| DOT        | 26.35        | 20.41        | 5.93        | 16.21        |
| GEBM (ULA) | <b>23.02</b> | 16.23        | <b>5.21</b> | 14.00        |
| GEBM (KLA) | 24.29        | <b>15.25</b> | 5.38        | <b>13.94</b> |

Table 2: FID scores for different sampling methods using the same trained SNGAN (ConvNet): KALE-GAN as a baseline w/o critic information.

**Density Estimation** We next quantify how well Algorithm 1 succeeds in learning maximum likelihood solutions, in the particular case that the likelihood is well defined and the model reduces back to an EBM (Proposition 2). This not only serves as a sanity check on our approach, but also shows that it results in comparable performance to training methods specific to EBMs. To have a closed-form reference likelihood to compare against, we consider the case where the dimension of the latent space is equal to data-dimension and choose the base  $\mathbb{G}$  of the GEBM to be a Real NVP (Ding et al. (2019)) with density  $\exp(-r(x))$  and energy  $E(x) = h(x) - r(x)$ . Thus, in this particular case, the GEBM has a well defined likelihood over the whole space, and we are precisely in the setting of Proposition 2, which shows that this GEBM is equal to an EBM with density proportional to  $\exp(-h)$ . We further require the EBM to be a second Real NVP so that its density has a closed form expression. Thus the likelihood of the GEBM can also be evaluated in closed-form. We consider 5 UCI datasets (Dheeru and Taniskidou, 2017) for which we use the same pre-processing as in (Wenliang et al., 2019). For comparison, we train the EBM by direct maximum likelihood (ML) and contrastive divergence (CD). To train the GEBM, we use Algorithm 1, which doesn’t directly exploit the closed-form expression of the likelihood (unlike direct ML). We thus use either (6) (KALE-DV) or (7) (KALE-F) to estimate the normalizing constant. More details are given in Appendix G.2. **Results:** Table 3 reports the Negative Log-Likelihood (NLL) evaluated on the test set and corresponding to the best performance on the validation set. Training the GEBM using Algorithm 1 leads to comparable performance as (CD) and (ML). As shown in Figure 7 of Appendix E, (KALE-DV) and (KALE-F) maintain a small error gap between the training and test NLL and, as discussed in Section 3.1 and Appendix F, (KALE-F) leads to more accurate estimates of the log-partition function, with a relative error of order 0.1% compared to 10% for (KALE-DV).

|                 | RedWine<br>$d = 11, N \sim 10^3$ | Whitewine<br>$d = 11, N \sim 10^3$ | Parkinsons<br>$d = 15, N \sim 10^3$ | Hepmass<br>$d = 22, N \sim 10^5$ | Miniboone<br>$d = 43, N \sim 10^4$ |
|-----------------|----------------------------------|------------------------------------|-------------------------------------|----------------------------------|------------------------------------|
| NVP w ML        | 11.98                            | 13.05                              | 14.5                                | 24.89                            | 42.28                              |
| NVP w CD        | 11.88                            | 13.01                              | 14.06                               | <b>22.89</b>                     | 39.36                              |
| NVP w KALE (DV) | 11.6                             | 12.77                              | <b>13.26</b>                        | 26.56                            | 46.48                              |
| NVP w KALE (F)  | <b>11.19</b>                     | <b>12.66</b>                       | <b>13.26</b>                        | 24.66                            | <b>38.35</b>                       |

Table 3: UCI datasets: Negative log-likelihood computed on the test set and corresponding to the best performance on the validation set. Best method in boldface.

## REFERENCES

- Arbel, M. and Gretton, A. (2018). Kernel Conditional Exponential Family. In *International Conference on Artificial Intelligence and Statistics*, pages 1337–1346.
- Arbel, M., Sutherland, D., Binkowski, M., and Gretton, A. (2018). On gradient regularizers for mmd gans. In *Advances in Neural Information Processing Systems 31*. Curran Associates, Inc.
- Arjovsky, M., Chintala, S., and Bottou, L. (2017). Wasserstein generative adversarial networks. In *Proceedings of the 34th International Conference on Machine Learning*, volume 70 of *Proceedings of Machine Learning Research*, International Convention Centre, Sydney, Australia. PMLR.
- Arora, S., Ge, R., Liang, Y., Ma, T., and Zhang, Y. (2017). Generalization and equilibrium in generative adversarial nets (GANs). In *Proceedings of the 34th International Conference on Machine Learning*, volume 70 of *Proceedings of Machine Learning Research*, pages 224–232. PMLR.
- Azadi, S., Olsson, C., Darrell, T., Goodfellow, I., and Odena, A. (2019). Discriminator rejection sampling. In *International Conference on Learning Representations*.
- Betancourt, M., Byrne, S., Livingstone, S., and Girolami, M. (2017). The geometric foundations of Hamiltonian Monte Carlo. *Bernoulli*, 23(4A):2257–2298.
- Bińkowski, M., Sutherland, D. J., Arbel, M., and Gretton, A. (2018). Demystifying MMD GANs. In *International Conference on Learning Representations*.
- Bottou, L., Arjovsky, M., Lopez-Paz, D., and Oquab, M. (2017). Geometrical insights for implicit generative modeling. In *Braverman Readings in Machine Learning*.
- Brehmer, J. and Cranmer, K. (2020). Flows for simultaneous manifold learning and density estimation. *arXiv preprint arXiv:2003.13913*.
- Brock, A., Donahue, J., and Simonyan, K. (2018). Large scale gan training for high fidelity natural image synthesis. *arXiv preprint arXiv:1809.11096*.
- Che, T., Zhang, R., Sohl-Dickstein, J., Larochelle, H., Paull, L., Cao, Y., and Bengio, Y. (2020). Your GAN is secretly an energy-based model and you should use discriminator driven latent sampling.
- Chen, T., Zhai, X., Ritter, M., Lucic, M., and Houlsby, N. (2019). Self-supervised gans via auxiliary rotation loss. In *Proceedings of the IEEE Conference on Computer Vision and Pattern Recognition*, pages 12154–12163.
- Cheng, X., Chatterji, N. S., Bartlett, P. L., and Jordan, M. I. (2017). Underdamped langevin mcmc: A non-asymptotic analysis. *arXiv preprint arXiv:1707.03663*.
- Chu, C., Minami, K., and Fukumizu, K. (2020). Smoothness and stability in gans. In *International Conference on Learning Representations*.
- Cornish, R., Caterini, A. L., Deligiannidis, G., and Doucet, A. (2020). Relaxing bijectivity constraints with continuously indexed normalising flows.
- Cranmer, K., Pavez, J., and Louppe, G. (2016). Approximating likelihood ratios with calibrated discriminative classifiers.
- Dai, B., Dai, H., Gretton, A., Song, L., Schuurmans, D., and He, N. (2019a). Kernel exponential family estimation via doubly dual embedding. In *Proceedings of Machine Learning Research*, volume 89 of *Proceedings of Machine Learning Research*, pages 2321–2330. PMLR.
- Dai, B., Liu, Z., Dai, H., He, N., Gretton, A., Song, L., and Schuurmans, D. (2019b). Exponential Family Estimation via Adversarial Dynamics Embedding. *arXiv:1904.12083 [cs, stat]*. arXiv: 1904.12083.
- Davis, D. and Drusvyatskiy, D. (2018). Stochastic subgradient method converges at the rate  $\mathcal{O}(k^{-1/4})$  on weakly convex functions. *arXiv:1802.02988 [cs, math]*.
- Dheeru, D. and Taniskidou, E. K. (2017). Uci machine learning repository.

- Ding, X., Wang, Z. J., and Welch, W. J. (2019). Subsampling Generative Adversarial Networks: Density Ratio Estimation in Feature Space with Softplus Loss.
- Dinh, L., Sohl-Dickstein, J., and Bengio, S. (2016). Density estimation using real nvp.
- Donahue, J. and Simonyan, K. (2019). Large Scale Adversarial Representation Learning. *arXiv:1907.02544 [cs, stat]*. arXiv: 1907.02544.
- Donsker, M. D. and Varadhan, S. R. S. (1975). Asymptotic evaluation of certain markov process expectations for large time, i. 28(1):1–47. \_eprint: <https://onlinelibrary.wiley.com/doi/pdf/10.1002/cpa.3160280102>.
- Du, Y. and Mordatch, I. (2019). Implicit generation and modeling with energy based models. In *Advances in Neural Information Processing Systems 32*, pages 3608–3618. Curran Associates, Inc.
- Eberle, A., Guillin, A., and Zimmer, R. (2017). Couplings and quantitative contraction rates for Langevin dynamics. *The Annals of Probability*.
- Ekeland, I. and Témam, R. (1999). *Convex Analysis and Variational Problems*. Classics in Applied Mathematics. Society for Industrial and Applied Mathematics.
- Goodfellow, I., Pouget-Abadie, J., Mirza, M., Xu, B., Warde-Farley, D., Ozair, S., Courville, A., and Bengio, Y. (2014). Generative adversarial nets. In *Advances in Neural Information Processing Systems 27*, pages 2672–2680. Curran Associates, Inc.
- Grathwohl, W., Wang, K.-C., Jacobsen, J.-H., Duvenaud, D., Norouzi, M., and Swersky, K. (2020). Your classifier is secretly an energy based model and you should treat it like one.
- Grover, A., Song, J., Kapoor, A., Tran, K., Agarwal, A., Horvitz, E. J., and Ermon, S. (2019). Bias correction of learned generative models using likelihood-free importance weighting. In *Advances in Neural Information Processing Systems 32*. Curran Associates, Inc.
- Gulrajani, I., Ahmed, F., Arjovsky, M., Dumoulin, V., and Courville, A. (2017). Improved training of wasserstein gans. In *Proceedings of the 31st International Conference on Neural Information Processing Systems*, Red Hook, NY, USA. Curran Associates Inc.
- Gutmann, M. U. and Hyvärinen, A. (2012). Noise-contrastive estimation of unnormalized statistical models, with applications to natural image statistics. *The Journal of Machine Learning Research*, 13(null):307–361.
- Heusel, M., Ramsauer, H., Unterthiner, T., Nessler, B., and Hochreiter, S. (2017). Gans trained by a two time-scale update rule converge to a local nash equilibrium. In *Advances in Neural Information Processing Systems 30*, pages 6626–6637. Curran Associates, Inc.
- Hinton, G. E. (2002). Training products of experts by minimizing contrastive divergence. *Neural Computation*, 14(8):1771–1800.
- Ho, J. and Ermon, S. (2016). Generative adversarial imitation learning. In *Advances in neural information processing systems*, pages 4565–4573.
- Hyvärinen, A. (2005). Estimation of Non-Normalized Statistical Models by Score Matching. *The Journal of Machine Learning Research*, 6:695–709.
- Kingma, D. P. and Welling, M. (2014). Auto-encoding variational Bayes. *ICLR*.
- Klenke, A. (2008). *Probability Theory: A Comprehensive Course*. World Publishing Corporation.
- Kodali, N., Abernethy, J., Hays, J., and Kira, Z. (2017). On Convergence and Stability of GANs. *arXiv:1705.07215 [cs]*. arXiv: 1705.07215.
- Krizhevsky, A. (2009). Learning multiple layers of features from tiny images. Technical report, University of Toronto.

- Lawson, J., Tucker, G., Dai, B., and Ranganath, R. (2019). Energy-inspired models: Learning with sampler-induced distributions. In *Advances in Neural Information Processing Systems 32*, pages 8501–8513. Curran Associates, Inc.
- LeCun, Y., Chopra, S., Hadsell, R., Ranzato, M., and Huang, F.-J. (2006). *Predicting Structured Data*, chapter A Tutorial on Energy-Based Learning. MIT Press.
- Li, C.-L., Chang, W.-C., Cheng, Y., Yang, Y., and Poczos, B. (2017). Mmd gan: Towards deeper understanding of moment matching network. In *Advances in Neural Information Processing Systems 30*, pages 2203–2213. Curran Associates, Inc.
- Liu, S., Bousquet, O., and Chaudhuri, K. (2017). Approximation and Convergence Properties of Generative Adversarial Learning.
- Liu, Z., Luo, P., Wang, X., and Tang, X. (2015). Deep learning face attributes in the wild.
- Milgrom, P. and Segal, I. (2002). Envelope Theorems for Arbitrary Choice Sets. *Econometrica*, 70.
- Miyato, T., Kataoka, T., Koyama, M., and Yoshida, Y. (2018). Spectral normalization for generative adversarial networks. In *International Conference on Learning Representations*.
- Nagarajan, V. and Kolter, J. Z. (2017). Gradient descent gan optimization is locally stable.
- Neal, R. M. (2010). Mcmc using hamiltonian dynamics. *Handbook of Markov Chain Monte Carlo*.
- Neklyudov, K., Egorov, E., and Vetrov, D. (2019). The implicit metropolis-hastings algorithm.
- Nguyen, X., Wainwright, M. J., and Jordan, M. I. (2010). Estimating divergence functionals and the likelihood ratio by convex risk minimization. *IEEE Transactions on Information Theory*, 56(11):5847–5861.
- Nowozin, S., Cseke, B., and Tomioka, R. (2016). f-gan: Training generative neural samplers using variational divergence minimization. In *Advances in Neural Information Processing Systems 29*, pages 271–279. Curran Associates, Inc.
- Oord, A. v. d., Kalchbrenner, N., and Kavukcuoglu, K. (2016). Pixel recurrent neural networks. *arXiv preprint arXiv:1601.06759*.
- Ostrovski, G., Dabney, W., and Munos, R. (2018). Autoregressive quantile networks for generative modeling. *arXiv preprint arXiv:1806.05575*.
- Papamakarios, G., Pavlakou, T., and Murray, I. (2017). Masked autoregressive flow for density estimation. *NIPS*.
- Radford, A., Metz, L., and Chintala, S. (2015). Unsupervised representation learning with deep convolutional generative adversarial networks. *arXiv preprint arXiv:1511.06434*.
- Raginsky, M., Rakhlin, A., and Telgarsky, M. (2017). Non-convex learning via stochastic gradient langevin dynamics: a nonasymptotic analysis.
- Ravuri, S., Mohamed, S., Rosca, M., and Vinyals, O. (2018). Learning implicit generative models with the method of learned moments. *arXiv preprint arXiv:1806.11006*.
- Retherford, J. R. (1978). Review: J. diestel and j. j. uhl, jr., vector measures. *Bull. Amer. Math. Soc.*, 84(4):681–685.
- Rezende, D. J. and Mohamed, S. (2015). Variational inference with normalizing flows. In *Proceedings of the 32nd International Conference on International Conference on Machine Learning - Volume 37, ICML’15*, pages 1530–1538. JMLR.org.
- Rezende, D. J., Mohamed, S., and Wierstra, D. (2014). Stochastic backpropagation and approximate inference in deep generative models. In *ICML*, pages 1278–1286.
- Rockafellar, R. T. (1970). *Convex analysis*. Princeton Mathematical Series. Princeton University Press, Princeton, N. J.

- Russakovsky, O., Deng, J., Su, H., Krause, J., Satheesh, S., Ma, S., Huang, Z., Karpathy, A., Khosla, A., Bernstein, M., Berg, A. C., and Fei-Fei, L. (2014). ImageNet Large Scale Visual Recognition Challenge. *arXiv:1409.0575 [cs]*. arXiv: 1409.0575.
- Sachs, M., Leimkuhler, B., and Danos, V. (2017). Langevin Dynamics with Variable Coefficients and Nonconservative Forces: From Stationary States to Numerical Methods. *Entropy*, 19.
- Sanjabi, M., Ba, J., Razaviyayn, M., and Lee, J. D. (2018). On the convergence and robustness of training gans with regularized optimal transport. In *Advances in Neural Information Processing Systems 31*, pages 7091–7101. Curran Associates, Inc.
- Simon-Gabriel, C.-J. and Scholkopf, B. (2018). Kernel distribution embeddings: Universal kernels, characteristic kernels and kernel metrics on distributions. *Journal of Machine Learning Research*, 19(44):1–29.
- Simsekli, U., Zhu, L., Teh, Y. W., and Gurbuzbalaban, M. (2020). Fractional Underdamped Langevin Dynamics: Retargeting SGD with Momentum under Heavy-Tailed Gradient Noise. *arXiv:2002.05685 [cs, stat]*. arXiv: 2002.05685.
- Sriperumbudur, B., Fukumizu, K., Kumar, R., Gretton, A., and Hyvärinen, A. (2017). Density estimation in infinite dimensional exponential families. *Journal of Machine Learning Research*.
- Sutherland, D., Strathmann, H., Arbel, M., and Gretton, A. (2018). Efficient and principled score estimation with Nystrom kernel exponential families. In *International Conference on Artificial Intelligence and Statistics*, pages 652–660.
- Tanaka, A. (2019). Discriminator optimal transport. In *Advances in Neural Information Processing Systems 32*. Curran Associates, Inc.
- Thekumparampil, K. K., Jain, P., Netrapalli, P., and Oh, S. (2019). Efficient algorithms for smooth minimax optimization. In *Advances in Neural Information Processing Systems 32*, pages 12680–12691. Curran Associates, Inc.
- Turner, R., Hung, J., Frank, E., Saatchi, Y., and Yosinski, J. (2019). Metropolis-Hastings generative adversarial networks. In *Proceedings of the 36th International Conference on Machine Learning*, volume 97 of *Proceedings of Machine Learning Research*, pages 6345–6353, Long Beach, California, USA. PMLR.
- Villani, C. (2009). Optimal transport: Old and new. Technical report.
- Wenliang, L., Sutherland, D., Strathmann, H., and Gretton, A. (2019). Learning deep kernels for exponential family densities. In *International Conference on Machine Learning*, pages 6737–6746.
- Wu, Y., Donahue, J., Balduzzi, D., Simonyan, K., and Lillicrap, T. (2019a). LOGAN: Latent Optimisation for Generative Adversarial Networks. *arXiv:1912.00953 [cs, stat]*. arXiv: 1912.00953.
- Wu, Y., Rosca, M., and Lillicrap, T. (2019b). Deep compressed sensing. In *Proceedings of the 36th International Conference on Machine Learning*, volume 97 of *Proceedings of Machine Learning Research*, pages 6850–6860, Long Beach, California, USA. PMLR.
- Yu, F., Seff, A., Zhang, Y., Song, S., Funkhouser, T., and Xiao, J. (2015). LSUN: Construction of a large-scale image dataset using deep learning with humans in the loop.
- Yu, L., Song, Y., Song, J., and Ermon, S. (2020). Training deep energy-based models with f-divergence minimization.
- Zenke, F., Poole, B., and Ganguli, S. (2017). Continual learning through synaptic intelligence. *Proceedings of machine learning research*, 70:3987.
- Zhang, P., Liu, Q., Zhou, D., Xu, T., and He, X. (2017). On the Discrimination-Generalization Tradeoff in GANs. *arXiv:1711.02771 [cs, stat]*. arXiv: 1711.02771.

## A KL APPROXIMATE LOWER-BOUND ESTIMATE

We discuss the relation between KALE (8) and the Kullback-Leibler divergence via Fenchel duality. Recall that a distribution  $\mathbb{P}$  is said to admit a density w.r.t.  $\mathbb{G}$  if there exists a real-valued measurable function  $r_0$  that is integrable w.r.t.  $\mathbb{G}$  and satisfies  $d\mathbb{P} = r_0 d\mathbb{G}$ . Such a density is also called the *Radon-Nikodym derivative* of  $\mathbb{P}$  w.r.t.  $\mathbb{G}$ . In this case, we have:

$$\text{KL}(\mathbb{P}||\mathbb{G}) = \int r_0 \log(r_0) d\mathbb{G}. \quad (13)$$

Nguyen et al. (2010); Nowozin et al. (2016) derived a variational formulation for the KL using Fenchel duality. By the duality theorem (Rockafellar, 1970), the convex and lower semi-continuous function  $\zeta : u \mapsto u \log(u)$  that appears in (13) can be expressed as the supremum of a concave function:

$$\zeta(u) = \sup_v uv - \zeta^*(v).$$

The function  $\zeta^*$  is called the *Fenchel dual* and is defined as  $\zeta^*(v) = \sup_u uv - \zeta(u)$ . By convention, the value of the objective is set to  $-\infty$  whenever  $u$  is outside of the domain of definition of  $\zeta^*$ . When  $\zeta(u) = u \log(u)$ , the Fenchel dual  $\zeta^*(v)$  admits a closed form expression of the form  $\zeta^*(v) = \exp(v-1)$ . Using the expression of  $\zeta$  in terms of its Fenchel dual  $\zeta^*$ , it is possible to express  $\text{KL}(\mathbb{P}||\mathbb{G})$  as the supremum of the variational objective (14) over all measurable functions  $h$ .

$$\mathcal{F}(h) := - \int h d\mathbb{P} - \int \exp(-h) d\mathbb{G} + 1. \quad (14)$$

Nguyen et al. (2010) provided the variational formulation for the reverse KL using a different choice for  $\zeta$ : ( $\zeta(u) = -\log(u)$ ). We refer to (Nowozin et al., 2016) for general  $f$ -divergences. Choosing a smaller set of functions  $\mathcal{H}$  in the variational objective (14) will lead to a lower bound on the KL. This is the *KL Approximate Lower-bound Estimate* (KALE):

$$\text{KALE}(\mathbb{P}||\mathbb{G}) = \sup_{h \in \mathcal{H}} \mathcal{F}(h) \quad (15)$$

In general,  $\text{KL}(\mathbb{P}||\mathbb{G}) \geq \text{KALE}(\mathbb{P}||\mathbb{G})$ . The bound is tight whenever the negative log-density  $h_0 = -\log r_0$  belongs to  $\mathcal{H}$ ; however, we do not require  $r_0$  to be well-defined in general. Equation (15) has the advantage that it can be estimated using samples from  $\mathbb{P}$  and  $\mathbb{G}$ . Given i.i.d. samples  $(X_1, \dots, X_N)$  and  $(Y_1, \dots, Y_M)$  from  $\mathbb{P}$  and  $\mathbb{G}$ , we denote by  $\hat{\mathbb{P}}$  and  $\hat{\mathbb{G}}$  the corresponding empirical distributions. A simple approach to estimate  $\text{KALE}(\mathbb{P}||\mathbb{G})$  is to use an  $M$ -estimator. This is achieved by optimizing the penalized objective

$$\hat{h} := \arg\max_{h \in \mathcal{H}} \widehat{\mathcal{F}}(h) - \frac{\lambda}{2} I^2(h), \quad (16)$$

where  $\widehat{\mathcal{F}}$  is an empirical version of  $\mathcal{F}$  and  $I^2(h)$  is a penalty term that prevents overfitting due to finite samples. The penalty  $I^2(h)$  acts as a regularizer favoring smoother solutions while the parameter  $\lambda$  determines the strength of the smoothing and is chosen to decrease as the sample size  $N$  and  $M$  increase. The  $M$ -estimator of  $\text{KALE}(\mathbb{P}||\mathbb{G})$  is obtained simply by plugging in  $\hat{h}$  into the empirical objective  $\widehat{\mathcal{F}}(h)$ :

$$\widehat{\text{KALE}}(\mathbb{P}||\mathbb{G}) := \widehat{\mathcal{F}}(\hat{h}). \quad (17)$$

We defer the consistency analysis of (17) to Appendix C where we provide convergence rates in a setting where the set of functions  $\mathcal{H}$  is a Reproducing Kernel Hilbert Space and under weaker assumptions that were not covered by the framework of Nguyen et al. (2010).

## B LATENT NOISE SAMPLING AND SMOOTHNESS OF KALE

### B.1 LATENT SPACE SAMPLING

Here we prove Proposition 5 for which we make the assumptions more precise:

**Assumption 1.** *We make the following assumption:*

- $\log \eta$  is strongly concave and admits a Lipschitz gradient.
- There exists a non-negative constant  $L$  such that for any  $x, x' \in \mathcal{X}$  and  $z, z' \in \mathcal{Z}$ :

$$\begin{aligned} |E(x) - E(x')| &\leq \|x - x'\|, & \|\nabla_x E(x) - \nabla_x E(x')\| &\leq \|x - x'\| \\ |G(z) - G(z')| &\leq \|z - z'\|, & \|\nabla_z G(z) - \nabla_z G(z')\| &\leq \|z - z'\| \end{aligned}$$

Throughout this section, we introduce  $U(z) := -\log(\eta(z)) + E(G(z))$  for simplicity.

*Proof of Proposition 1.* To sample from  $\mathbb{Q}_{G,E}$ , we first need to identify the *posterior latent* distribution  $\nu_{G,E}$  used to produce those samples. We rely on (18) which holds by definition of  $\mathbb{Q}_{G,E}$  for any test function  $h$  on  $\mathcal{X}$ :

$$\int h(x) d\mathbb{Q}(x) = \int h(G(z)) f(G(z)) \eta(z) dz, \quad (18)$$

Hence, the posterior latent distribution is given by  $\nu(z) = \eta(z) f(G(z))$ , and samples from GEBM are produced by first sampling from  $\nu_{G,E}$ , then applying the implicit map  $G$ ,

$$X \sim \mathbb{Q} \iff X = G(Z), \quad Z \sim \nu.$$

□

*Proof of Proposition 2.* the base distribution  $\mathbb{G}_\theta$  admits a density on the whole space denoted by  $\exp(-r_\theta)$  and the energy  $\tilde{E}_{\psi,\theta}$  is of the form  $\tilde{E}_{\psi,\theta} = E_\psi - r_\theta$  for some parametric function  $E_\psi$ , it is easy to see that  $\mathbb{Q}$  has a density proportional to  $\exp(-E_\psi)$  and is therefore equivalent to a standard EBM with energy  $E_\psi$ .

The converse holds as well, meaning that for any EBM with energy  $E_\psi$ , it is possible to construct a GEBM using an *importance weighting* strategy. This is achieved by first choosing a base  $\mathbb{G}_\theta$ , which is required to have an explicit density  $\exp(-r_\theta)$  up to a normalizing constant, then defining the energy of the GEBM to be  $\tilde{E}_{\psi,\theta} = E_\psi - r_\theta$  so that:

$$d\mathbb{Q}(x) \propto \exp(-\tilde{E}_{\psi,\theta}) d\mathbb{G}_\theta(x) \propto \exp(-E_\psi(x)) dx \quad (19)$$

Equation (19) effectively depends only on  $E_\psi$  and not on  $\mathbb{G}_\theta$  since the factor  $\exp(r_\theta)$  exactly compensates for the density of  $\mathbb{G}_\theta$ . The requirement that the base also admits a tractable implicit map  $G_\theta$  can be met by choosing  $\mathbb{G}_\theta$  to be a *normalizing flow* (Rezende and Mohamed, 2015) and does not restrict the class of possible EBMs that can be expressed as GEBMs. □

*Proof of Proposition 5.* Let  $\pi_t$  be the probability distribution of  $(z_t, v_t)$  at time  $t$  of the diffusion in (12), which we recall that

$$dz_t = v_t dt, \quad dv_t = -(\gamma v_t + u \nabla U(z_t)) + \sqrt{2\lambda} u dw_t,$$

We call  $\pi_\infty$  its corresponding invariant distribution given by

$$\pi_\infty(z, v) \propto \exp\left(-U(z) - \frac{1}{2}\|v\|^2\right)$$

By Lemma 6 we know that  $U$  is dissipative, bounded from below, and has a Lipschitz gradient. This allows to directly apply (Eberle et al., 2017)(Corollary 2.6.) which implies that

$$W_2(\pi_t, \pi_\infty) \leq C \exp(-tc),$$

where  $c$  is a positive constant and  $C$  only depends on  $\pi_\infty$  and the initial distribution  $\pi_0$ . Moreover, the constant  $c$  is given explicitly in (Eberle et al., 2017, Theorem 2.3) and is of order  $0(e^{-q})$  where  $q$  is the dimension of the latent space  $\mathcal{Z}$ .

We now consider an optimal coupling  $\Pi_t$  between  $\pi_t$  and  $\pi_0$ . Given joints samples  $((z_t, v_t), (z, v))$  from  $\Pi_t$ , we consider the following samples in input space  $(x_t, x) := (G(z_t), G(z))$ . Since  $z_t$  and  $z$  have marginals  $\pi_t$  and  $\pi_\infty$ , it is easy to see that  $x_t \sim \mathbb{P}_t$  and  $x \sim \mathbb{Q}$ . Therefore, by definition of the  $W_2$  distance, we have the following bound:

$$\begin{aligned}
W_2^2(\mathbb{P}_t, \mathbb{Q}) &\leq \mathbb{E}[\|x_t - x\|^2] \\
&\leq \int \|G(z_t) - G(z)\|^2 d\Pi_t(z_t, z) \\
&\leq L^2 \int \|z_t - z\|^2 d\Pi_t(z_t, z) \\
&\leq L^2 W_2^2(\pi_t, \pi_\infty) \leq C^2 L^2 \exp(-2tc).
\end{aligned}$$

The second line uses the definition of  $(x_t, x)$  as joint samples obtained by mapping  $(z_t, z)$ . The third line uses the assumption that  $B$  is  $L$ -Lipschitz. Finally, the last line uses that  $\Pi_t$  is an optimal coupling between  $\pi_t$  and  $\pi_\infty$ .  $\square$

**Lemma 6.** *Under Assumption 1, there exists  $A > 0$  and  $\lambda \in (0, \frac{1}{4}]$  such that*

$$\frac{1}{2} z^\top \nabla U(z) \geq \lambda \left( U(z) + \frac{\gamma^2}{4u} \|z\|^2 \right) - A, \quad \forall z \in \mathcal{Z}, \quad (20)$$

where  $\gamma$  and  $u$  are the coefficients appearing in (12). Moreover,  $U$  is bounded below and has a Lipschitz gradient.

*Proof.* For simplicity, let's call  $u(z) = -\log \eta(z)$ ,  $w(z) = E^* \circ B_{\theta^*}(z)$ , and denote by  $M$  an upper-bound on the Lipschitz constant of  $w$  and  $\nabla w$  which is guaranteed to be finite by assumption. Hence  $U(z) = u(z) + w(z)$ . Equation (20) is equivalent to having

$$z^\top \nabla u(z) - 2\lambda u(z) - \frac{\gamma^2}{2u} \|z\|^2 \geq 2\lambda w(z) - z^\top \nabla w(z) - 2A. \quad (21)$$

Using that  $w$  is Lipschitz, we have that  $w(z) \leq w(0) + M\|z\|$  and  $-z^\top \nabla w(z) \leq M\|z\|$ . Hence,  $2\lambda w(z) - z^\top \nabla w(z) - 2A \leq 2\lambda w(0) + (2\lambda + 1)M\|z\| - 2A$ . Therefore, a sufficient condition for (21) to hold is

$$z^\top \nabla u(z) - 2\lambda u(z) - \frac{\gamma^2}{2u} \|z\|^2 \geq (2\lambda + 1)M\|z\| - 2A + 2\lambda w(0). \quad (22)$$

We will now rely on the strong convexity of  $u$ , which holds by assumption, and implies the existence of a positive constant  $m > 0$  such that

$$\begin{aligned}
-u(z) &\geq -u(0) - z^\top \nabla u(z) + \frac{m}{2} \|z\|^2, \\
z^\top \nabla u(z) &\geq -\|z\| \|\nabla u(0)\| + m\|z\|^2.
\end{aligned}$$

This allows to write the following inequality,

$$\begin{aligned}
z^\top \nabla u(z) - 2\lambda u(z) - \frac{\gamma^2}{2u} \|z\|^2 &\geq (1 - 2\lambda) z^\top \nabla u(z) + \lambda \left( m + \frac{\gamma^2}{2u} \right) \|z\|^2 - 2\lambda u(0) \\
&\geq (1 - \lambda \left( m + \frac{\gamma^2}{2u} \right)) \|z\|^2 - (1 - 2\lambda) \|z\| \|\nabla u(0)\| - 2\lambda u(0).
\end{aligned}$$

Combining the previous inequality with (22) and denoting  $M' = \|\nabla u(0)\|$ , it is sufficient to find  $A$  and  $\lambda$  satisfying

$$\left( 1 - \lambda \left( m + \frac{\gamma^2}{2u} \right) \right) \|z\|^2 - (M + M' + 2\lambda(M - M')) \|z\| - 2\lambda(u(0) + w(0)) + 2A \geq 0.$$

The l.h.s. in the above equation is a quadratic function in  $\|z\|$  and admits a global minimum when  $\lambda < \left( m + \frac{\gamma^2}{2u} \right)^{-1}$ . The global minimum is always positive provided that  $A$  is large enough.

To see that  $U$  is bounded below, it suffice to note, by Lipschitzness of  $w$ , that  $w(z) \geq w(0) - M\|z\|$  and by strong convexity of  $u$  that

$$u(z) \geq u(0) + M'\|z\| + \frac{m}{2} \|z\|^2.$$

Hence,  $U$  is lower-bounded by a quadratic function in  $\|z\|$  with positive leading coefficient  $\frac{m}{2}$ , hence it must be lower-bounded by a constant. Finally, by assumption,  $u$  and  $w$  have Lipschitz gradients, which directly implies that  $U$  has a Lipschitz gradient.  $\square$

## B.2 TOPOLOGICAL AND SMOOTHNESS PROPERTIES OF KALE

**Topological properties of KALE.** Denseness and smoothness of the energy class  $\mathcal{E}$  are the key to guarantee that KALE is a reliable criterion for measuring convergence. We thus make the following assumptions on  $\mathcal{E}$ :

- (A) For all  $E \in \mathcal{E}$ ,  $-E \in \mathcal{E}$  and there is  $C_E > 0$  such that  $cE \in \mathcal{E}$  for  $0 \leq c \leq C_E$ . For any continuous function  $g$ , any compact support  $K$  in  $\mathcal{X}$  and any precision  $\epsilon > 0$ , there exists a finite linear combination of energies  $G = \sum_{i=1}^r a_i E_i$  such that  $\sup_{x \in K} |f(x) - G(x)| \leq \epsilon$ .
- (B) All energies  $E$  in  $\mathcal{E}$  are Lipschitz in their input with the same Lipschitz constant  $L > 0$ .

Assumption (A) holds in particular when  $\mathcal{E}$  contains feedforward networks with a given number of parameters. In fact networks with a single neuron are enough, as shown in (Zhang et al., 2017, Theorem 2.3). Assumption (B) holds when additional regularization of the energy is enforced during training by methods such as **spectral normalization** Miyato et al. (2018) or **gradient penalty** Gulrajani et al. (2017) as done in Section 6. Proposition 3 states the topological properties of KALE ensuring that it can be used as a criterion for weak convergence. A proof is given in Appendix B.2.1 and is a consequence of (Zhang et al., 2017, Theorem B.1).

**Proposition 7.** *Under Assumptions (A) and (B) it holds that:*

1.  $\text{KALE}(\mathbb{P}||\mathbb{G}) \geq 0$  with  $\text{KALE}(\mathbb{P}||\mathbb{G}) = 0$  if and only if  $\mathbb{P} = \mathbb{G}$ .
2.  $\text{KALE}(\mathbb{P}||\mathbb{G}^n) \rightarrow 0$  if and only if  $\mathbb{G}^n \rightarrow \mathbb{P}$  under the weak topology.

### B.2.1 TOPOLOGICAL PROPERTIES OF KALE

In this section we prove Proposition 3. We first start by recalling the required assumptions and make them more precise:

**Assumption 2.** *Assume the following holds:*

- The set  $\mathcal{X}$  is compact.
- For all  $E \in \mathcal{E}$ ,  $-E \in \mathcal{E}$  and there is  $C_E > 0$  such that  $cE \in \mathcal{E}$  for  $0 \leq c \leq C_E$ . For any continuous function  $g$ , any compact support  $K$  in  $\mathcal{X}$  and any precision  $\epsilon > 0$ , there exists a finite linear combination of energies  $G = \sum_{i=1}^r a_i E_i$  such that  $|f(x) - G(x)| \leq \epsilon$  on  $K$ .
- All energies  $E$  in  $\mathcal{E}$  are Lipschitz in their input with the same Lipschitz constant  $L > 0$ .

For simplicity we consider the set  $\mathcal{H} = \mathcal{E} + \mathbb{R}$ , i.e.:  $\mathcal{H}$  is the set of functions  $h$  of the form  $h = E + c$  where  $E \in \mathcal{E}$  and  $c \in \mathbb{R}$ . In all what follows  $\mathcal{P}_1$  is the set of probability distributions with finite first order moments. We consider the notion of weak convergence on  $\mathcal{P}_1$  as defined in (Villani, 2009, Definition 6.8) which is equivalent to convergence in the Wasserstein-1 distance  $W_1$ .

*Proof of Proposition 3.* We proceed by proving the **separation** properties (1<sup>st</sup> statement), then the **metrization of the weak topology** (2<sup>nd</sup> statement).

**Separation.** We have by Assumption 2 that  $0 \in \mathcal{E}$ , hence by definition  $\text{KALE}(\mathbb{P}||\mathbb{G}) \geq \mathcal{F}_{\mathbb{P},\mathbb{G}}(0) = 0$ . On the other hand, whenever  $\mathbb{P} = \mathbb{G}$ , it holds that:

$$\mathcal{F}_{\mathbb{P},\mathbb{G}}(h) = - \int (\exp(-h) + h - 1) d\mathbb{P}, \quad \forall h \in \mathcal{H}.$$

Moreover, by convexity of the exponential, we know that  $\exp(-x) + x - 1 \geq 0$  for all  $x \in \mathbb{R}$ . Hence,  $\mathcal{F}_{\mathbb{P},\mathbb{G}}(h) \leq \mathcal{F}_{\mathbb{P},\mathbb{G}}(0) = 0$  for all  $h \in \mathcal{H}$ . This directly implies that  $\text{KALE}(\mathbb{P}||\mathbb{G}) = 0$ . For the converse, we will use the same argument as in the proof of (Zhang et al., 2017, Theorem B.1). Assume that  $\text{KALE}(\mathbb{P}||\mathbb{G}) = 0$  and let  $h$  be in  $\mathcal{H}$ . By Assumption 2, there exists  $C_h > 0$  such that  $ch \in \mathcal{H}$  and we have:

$$\mathcal{F}(ch) \leq \text{KALE}(\mathbb{P}||\mathbb{G}) = 0.$$

Now dividing by  $c$  and taking the limit to 0, it is easy to see that  $-\int h d\mathbb{P} + \int h d\mathbb{G} \leq 0$ . Again, by Assumption 2, we also know that  $-h \in \mathcal{H}$ , hence,  $\int h d\mathbb{P} - \int h d\mathbb{G} \leq 0$ . This necessarily implies that  $\int h d\mathbb{P} = \int h d\mathbb{G}$ .

$\int h d\mathbb{G} = 0$  for all  $h \in \mathcal{H}$ . By the density of  $\mathcal{H}$  in the set continuous functions on compact sets, we can conclude that the equality holds for any continuous and bounded function, which in turn implies that  $\mathbb{P} = \mathbb{G}$ .

**Metrization of the weak topology.** We first show that for any  $\mathbb{P}$  and  $\mathbb{G}$  with finite first moment, it holds that  $\text{KALE}(\mathbb{P}|\mathbb{G}) \leq LW_1(\mathbb{P}, \mathbb{G})$ , where  $W_1(\mathbb{P}, \mathbb{G})$  is the Wasserstein-1 distance between  $\mathbb{P}$  and  $\mathbb{G}$ . For any  $h \in \mathcal{H}$  the following holds:

$$\begin{aligned} \mathcal{F}(h) &= - \int h d\mathbb{P} - \int \exp(-h) d\mathbb{G} + 1 \\ &= \int h(x) d\mathbb{G}(x) - h(x') d\mathbb{P}(x') \\ &\quad - \int \underbrace{(\exp(-h) + h - 1)}_{\geq 0} d\mathbb{G} \\ &\leq \int h(x) d\mathbb{G}(x) - h(x') d\mathbb{P}(x') \leq LW_1(\mathbb{P}, \mathbb{G}) \end{aligned}$$

The first inequality results from the convexity of the exponential while the last one is a consequence of  $h$  being  $L$ -Lipschitz. This allows to conclude that  $\text{KALE}(\mathbb{P}|\mathbb{G}) \leq LW_1(\mathbb{P}, \mathbb{G})$  after taking the supremum over all  $h \in \mathcal{H}$ . Moreover, since  $W_1$  metrizes the weak convergence on  $\mathcal{P}_1$  (Villani, 2009, Theorem 6.9), it holds that whenever a sequence  $\mathbb{G}^n$  converges weakly towards  $\mathbb{P}$  in  $\mathcal{P}_1$  we also have  $W_1(\mathbb{P}, \mathbb{G}^n) \rightarrow 0$  and thus  $\text{KALE}(\mathbb{P}|\mathbb{G}^n) \rightarrow 0$ . The converse is a direct consequence of (Liu et al., 2017, Theorem 10) since by assumption  $\mathcal{X}$  is compact.

**Well-defined learning.** Assume that for any  $\epsilon > 0$  and any  $h$  and  $h'$  in  $\mathcal{E}$  there exists  $f$  in  $2\mathcal{E}$  such that  $\|h + h' - f\|_\infty \leq \epsilon$  then there exists a constant  $C$  such that:

$$\text{KALE}(\mathbb{P}, \mathbb{Q}) \leq C \text{KALE}(\mathbb{P}, \mathbb{G})$$

This means that the proposed learning procedure which first finds the optimal energy  $E^*$  given a base  $\mathbb{G}$  by maximum likelihood then minimizes  $\text{KALE}(\mathbb{P}, \mathbb{G})$  ensures ends up minimizing the distance between the data and the generalized energy-based model  $\mathbb{Q}$ .

$$\begin{aligned} \text{KALE}(\mathbb{P}, \mathbb{Q}) &= \sup_{h \in \mathcal{E}} \mathcal{L}_{\mathbb{P}, \mathbb{Q}_\mathbb{G}}(h) \\ &= -\text{KALE}(\mathbb{P}, \mathbb{G}) + \sup_{h \in \mathcal{E}} \mathcal{L}_{\mathbb{P}, \mathbb{G}}(h + E^*) \end{aligned}$$

Let's choose  $\epsilon = \text{KALE}(\mathbb{P}, \mathbb{G})$  and let  $h \in 2\mathcal{E}$  such that  $\|h + E^* - f\|_\infty \leq \epsilon$ . We have by concavity of the function  $(\alpha, \beta) \mapsto \mathcal{L}_{\mathbb{P}, \mathbb{G}}(\alpha(h + E^* - f) + \beta f)$  we have that:

$$\mathcal{L}_{\mathbb{P}, \mathbb{G}}(h + E^*) \leq 2\mathcal{L}_{\mathbb{P}, \mathbb{G}}\left(\frac{1}{2}f\right) - \mathcal{L}_{\mathbb{P}, \mathbb{G}}(h + E^* - f)$$

By assumption, we have that  $\|h + E^* - f\|_\infty \leq \epsilon$ , thus  $|\mathcal{L}_{\mathbb{P}, \mathbb{G}}(h + E^* - f)| \leq 2\epsilon$ . Moreover, we have that  $\mathcal{L}_{\mathbb{P}, \mathbb{G}}(\frac{1}{2}f) \leq \text{KALE}(\mathbb{P}, \mathbb{G})$  since  $\frac{1}{2}f \in \mathcal{E}$ . This ensures that:

$$\mathcal{L}_{\mathbb{P}, \mathbb{G}}(h + E^*) \leq 3\text{KALE}(\mathbb{P}, \mathbb{G}).$$

Finally, we have shown that:

$$\text{KALE}(\mathbb{P}, \mathbb{Q}) \leq 2\text{KALE}(\mathbb{P}, \mathbb{G}).$$

Hence, minimizing  $\text{KALE}(\mathbb{P}, \mathbb{G})$  directly minimizes  $\text{KALE}(\mathbb{P}, \mathbb{Q})$ . □

## B.2.2 SMOOTHNESS PROPERTIES OF KALE

We will now prove Theorem 4. We begin by stating the assumptions that will be used in this section:

- (I)  $\mathcal{E}$  is parametrized by a compact set of parameters  $\Psi$ .

- (II) Functions in  $\mathcal{E}$  are jointly continuous w.r.t.  $(\psi, x)$  and are  $L$ -lipschitz and  $L$ -smooth w.r.t. the input  $x$ :

$$\begin{aligned}\|E_\psi(x) - E_\psi(x')\| &\leq L_e \|x - x'\|, \\ \|\nabla_x E_\psi(x) - \nabla_x E_\psi(x')\| &\leq L_e \|x - x'\|.\end{aligned}$$

- (III)  $(\theta, z) \mapsto G_\theta(z)$  is jointly continuous in  $\theta$  and  $z$ , with  $z \mapsto G_\theta(z)$  uniformly Lipschitz w.r.t.  $z$ :

$$\|G_\theta(z) - G_{\theta'}(z)\| \leq L_b \|z - z'\|, \quad \forall z, z' \in \mathcal{Z}, \theta \in \Theta.$$

There exists non-negative functions  $a$  and  $b$  defined from  $\mathcal{Z}$  to  $\mathbb{R}$  such that  $\theta \mapsto G_\theta(z)$  are  $a$ -Lipschitz and  $b$ -smooth in the following sense:

$$\begin{aligned}\|G_\theta(z) - G_{\theta'}(z)\| &\leq a(z) \|\theta - \theta'\|, \\ \|\nabla_\theta G_\theta(z) - \nabla_\theta G_{\theta'}(z)\| &\leq b(z) \|\theta - \theta'\|.\end{aligned}$$

Moreover,  $a$  and  $b$  are integrable in the following sense:

$$\int a(z)^2 \exp(2L_e L_b \|z\|) d\eta(z) < \infty, \quad \int \exp(L_e L_b \|z\|) d\eta(z) < \infty,$$

$$\int b(z) \exp(L_e L_b \|z\|) d\eta(z) < \infty.$$

To simplify notation, we will denote by  $\mathcal{L}_\theta(f)$  the expected  $\mathbb{G}_\theta$  log-likelihood under  $\mathbb{P}$ . In other words,

$$\mathcal{L}_\theta(E) := \mathcal{L}_{\mathbb{P}, \mathbb{G}_\theta}(E) = - \int E d\mathbb{P} - \log \int \exp(-E) d\mathbb{G}_\theta.$$

We also denote by  $p_{E, \theta}$  the density of the model w.r.t.  $\mathbb{G}_\theta$ ,

$$p_{E, \theta} = \frac{\exp(-E)}{Z_{\mathbb{G}_\theta, E}}, \quad Z_{\mathbb{G}_\theta, E} = \int \exp(-E) d\mathbb{G}_\theta.$$

We write  $\mathcal{K}(\theta) := \text{KALE}(\mathbb{P} || \mathbb{G}_\theta)$  to emphasize the dependence on  $\theta$ .

*Proof of Theorem 4.* To show that sub-gradient methods converge to local optima, we only need to show that  $\mathcal{K}$  is Lipschitz continuous and weakly convex. This directly implies convergence to local optima for sub-gradient methods, according to [Davis and Drusvyatskiy \(2018\)](#); [Thekumparampil et al. \(2019\)](#). Lipschitz continuity ensures that  $\mathcal{K}$  is differentiable for almost all  $\theta \in \Theta$ , and weak convexity simply means that there exists some positive constant  $C \geq 0$  such that  $\theta \mapsto \mathcal{K}(\theta) + C\|\theta\|^2$  is convex. We now proceed to show these two properties.

We will first prove that  $\theta \mapsto \mathcal{K}(\theta)$  is weakly convex in  $\theta$ . By Lemma 8, we know that for any  $E \in \mathcal{E}$ , the function  $\theta \mapsto \mathcal{L}_\theta(E)$  is  $M$ -smooth for the same positive constant  $M$ . This directly implies that it is also weakly convex and the following inequality holds:

$$\mathcal{L}_{\theta_t}(E) \leq t\mathcal{L}_\theta(E) + (1-t)\mathcal{L}_{\theta'}(E) + \frac{M}{2}t(1-t)\|\theta - \theta'\|^2.$$

Taking the supremum w.r.t.  $E$ , it follows that

$$\mathcal{K}(\theta_t) \leq t\mathcal{K}(\theta) + (1-t)\mathcal{K}(\theta') + \frac{M}{2}t(1-t)\|\theta - \theta'\|^2.$$

This means precisely that  $\mathcal{K}$  is weakly convex in  $\theta$ .

To prove that  $\mathcal{K}$  is Lipschitz, we will also use Lemma 8, which states that  $\mathcal{L}_\theta(E)$  is Lipschitz in  $\theta$  uniformly on  $\mathcal{E}$ . Hence, the following holds:

$$\mathcal{L}_\theta(E) \leq \mathcal{L}_{\theta'}(E) + LC\|\theta - \theta'\|.$$

Again, taking the supremum over  $E$ , it follows directly that

$$\mathcal{K}(\theta) \leq \mathcal{K}(\theta') + LC\|\theta - \theta'\|.$$

We conclude that  $\mathcal{K}$  is Lipschitz by exchanging the roles of  $\theta$  and  $\theta'$  to get the other side of the inequality. Hence, by the Rademacher theorem,  $\mathcal{K}$  is differentiable for almost all  $\theta$ .

We will now provide an expression for the gradient of  $\mathcal{K}$ . By Lemma 9 we know that  $\psi \mapsto \mathcal{L}_\theta(E_\psi)$  is continuous and by Assumption (I)  $\Psi$  is compact. Therefore, the supremum  $\sup_{E \in \mathcal{E}} \mathcal{L}_\theta(E)$  is achieved for some function  $E_\theta^*$ . Moreover, we know by Lemma 8 that  $\mathcal{L}_\theta(E)$  is smooth uniformly on  $\mathcal{E}$ , therefore the family  $(\partial_\theta \mathcal{L}_\theta(E))_{E \in \mathcal{E}}$  is equi-differentiable. We are in position to apply [Milgrom and Segal \(2002\)](#) (Theorem 3) which ensures that  $\mathcal{K}(\theta)$  admits left and right partial derivatives given by

$$\begin{aligned}\partial_e^+ \mathcal{K}(\theta) &= \lim_{\substack{t \geq 0 \\ t \rightarrow 0}} \partial_\theta \mathcal{L}_\theta(E_{\theta+te}^*)^\top e, \\ \partial_e^- \mathcal{K}(\theta) &= \lim_{\substack{t \leq 0 \\ t \rightarrow 0}} \partial_\theta \mathcal{L}_\theta(E_{\theta+te}^*)^\top e,\end{aligned}\tag{23}$$

where  $e$  is a given direction in  $\mathbb{R}^r$ . Moreover, the theorem also states that  $\mathcal{K}(\theta)$  is differentiable iff  $t \mapsto E_{\theta+te}^*$  is continuous at  $t=0$ . Now, recalling that  $\mathcal{K}(\theta)$  is actually differentiable for almost all  $\theta$ , it must hold that  $E_{\theta+te}^* \rightarrow_{t \rightarrow 0} E_\theta^*$  and  $\partial_e^+ \mathcal{K}(\theta) = \partial_e^- \mathcal{K}(\theta)$  for almost all  $\theta$ . This implies that the two limits in (23) are actually equal to  $\partial_\theta \mathcal{L}_\theta(E_\theta^*)^\top e$ . The gradient of  $\mathcal{K}$ , whenever defined, is therefore given by

$$\nabla_\theta \mathcal{K}(\theta) = Z_{\mathbb{G}_\theta, E_\theta^*}^{-1} \int \nabla_x E_\theta^*(G_\theta(z)) \nabla_\theta G_\theta(z) \exp(-E_\theta^*(G_\theta(z))) \eta(z) dz.$$

□

**Lemma 8.** *Under Assumptions (I) to (III), the functional  $\mathcal{L}_\theta(E)$  is Lipschitz and smooth in  $\theta$  uniformly on  $\mathcal{E}$ :*

$$\begin{aligned}|\mathcal{L}_\theta(E) - \mathcal{L}_{\theta'}(E)| &\leq LC \|\theta - \theta'\|, \\ \|\partial_\theta \mathcal{L}_\theta(E) - \partial_\theta \mathcal{L}_{\theta'}(E)\| &\leq 2CL(1+L) \|\theta - \theta'\|.\end{aligned}$$

*Proof.* By Lemma 9, we have that  $\mathcal{L}_\theta(E)$  is differentiable, and that

$$\partial_\theta \mathcal{L}_\theta(E) := \int (\nabla_x E \circ G_\theta) \nabla_\theta G_\theta(p_{E,\theta} \circ G_\theta) d\eta.$$

Lemma 9 ensures that  $\|\partial_\theta \mathcal{L}_\theta(E)\|$  is bounded by some positive constant  $C$  that is independent from  $E$  and  $\theta$ . This implies in particular that  $\mathcal{L}_\theta(E)$  is Lipschitz with a constant  $C$ . We will now show that it is also smooth. For this, we need to control the difference

$$D := \|\partial_\theta \mathcal{L}_\theta(E) - \partial_\theta \mathcal{L}_{\theta'}(E)\|.$$

We have by triangular inequality:

$$\begin{aligned}D &\leq \underbrace{\int \|\nabla_x E \circ G_\theta - \nabla_x E \circ G_{\theta'}\| \|\nabla_\theta G_\theta\| (p_{E,\theta} \circ G_\theta) d\eta}_I \\ &\quad + \underbrace{\int \|\nabla_x E \circ G_\theta\| \|\nabla_\theta G_\theta - \nabla_\theta G_{\theta'}\| (p_{E,\theta} \circ G_\theta) d\eta}_{II} \\ &\quad + \underbrace{\int \|\nabla_x E \circ G_\theta\| \|\nabla_\theta G_\theta\| |p_{E,\theta} \circ G_\theta - p_{E,\theta'} \circ G_{\theta'}| d\eta}_{III}.\end{aligned}$$

The first term can be upper-bounded using  $L_e$ -smoothness of  $E$  and the fact that  $G_\theta$  is Lipschitz in  $\theta$ :

$$\begin{aligned}I &\leq L_e \|\theta - \theta'\| \int |a|^2 (p_{E,\theta} \circ G_\theta) d\eta \\ &\leq L_e C \|\theta - \theta'\|.\end{aligned}$$

The last inequality was obtained by Lemma 10. Similarly, using that  $\nabla_\theta G_\theta$  is Lipschitz, it follows by Lemma 10 that

$$\begin{aligned}II &\leq L_e \|\theta - \theta'\| \int |b| (p_{E,\theta} \circ G_\theta) d\eta \\ &\leq L_e C \|\theta - \theta'\|.\end{aligned}$$

Finally, for the last term  $III$ , we first consider a path  $\theta_t = t\theta + (1-t)\theta'$  for  $t \in [0, 1]$ , and introduce the function  $s(t) := p_{E, \theta_t} \circ G_{\theta_t}$ . We will now control the difference  $p_{E, \theta} \circ G_{\theta} - p_{E, \theta'} \circ G_{\theta'}$ , also equal to  $s(1) - s(0)$ . Using the fact that  $s_t$  is absolutely continuous we have that  $s(1) - s(0) = \int_0^1 s'(t) dt$ . The derivative  $s'(t)$  is simply given by  $s'(t) = (\theta - \theta')^\top (M_t - \bar{M}_t) s(t)$  where  $M_t = (\nabla_x E \circ B_{\theta_t}) \nabla_{\theta} G_{\theta_t}$  and  $\bar{M}_t = \int M_t p_{E, \theta_t} \circ G_{\theta_t} d\eta$ . Hence,

$$s(1) - s(0) = (\theta - \theta')^\top \int_0^1 (M_t - \bar{M}_t) s(t) dt.$$

We also know that  $M_t$  is upper-bounded by  $La(z)$ , which implies

$$\begin{aligned} III &\leq L_e^2 \|\theta - \theta'\| \int_0^1 \left( \int |a(z)|^2 s(t)(z) d\eta(z) + \left( \int a(z) s(t)(z) d\eta(z) \right)^2 \right) \\ &\leq L_e^2 (C + C^2) \|\theta - \theta'\|, \end{aligned}$$

where the last inequality is obtained using Lemma 10. This allows us to conclude that  $\mathcal{L}_{\theta}(E)$  is smooth for any  $E \in \mathcal{E}$  and  $\theta \in \Theta$ .  $\square$

**Lemma 9.** *Under Assumptions (II) and (III), it holds that  $\psi \mapsto \mathcal{L}_{\theta}(E_{\psi})$  is continuous, and that  $\theta \mapsto \mathcal{L}_{\theta}(E_{\psi})$  is differentiable in  $\theta$  with gradient given by*

$$\partial_{\theta} \mathcal{L}_{\theta}(E) := \int (\nabla_x E \circ G_{\theta}) \nabla_{\theta} G_{\theta}(p_{E, \theta} \circ G_{\theta}) d\eta.$$

Moreover, the gradient is bounded uniformly in  $\theta$  and  $E$ :

$$\|\nabla_{\theta} \mathcal{L}_{\theta}(E)\| \leq L_e \left( \int \exp(-L_e L_b \|z\|) d\eta(z) \right)^{-1} \int a(z) \exp(L_e L_b \|z\|) d\eta(z).$$

*Proof.* To show that  $\psi \mapsto \mathcal{L}_{\theta}(E_{\psi})$  is continuous, we will use the dominated convergence theorem. We fix  $\psi_0$  in the interior of  $\Psi$  and consider a compact neighborhood  $W$  of  $\psi_0$ . By assumption, we have that  $(\psi, x) \mapsto E_{\psi}(x)$  and  $(\psi, z) \mapsto E_{\psi}(G_{\theta}(z))$  are jointly continuous. Hence,  $|E_{\psi}(0)|$  and  $|E_{\psi}(G_{\theta}(0))|$  are bounded on  $W$  by some constant  $C$ . Moreover, by Lipschitz continuity of  $x \mapsto E_{\psi}$ , we have

$$\begin{aligned} |E_{\psi}(x)| &\leq |E_{\psi}(0)| + L_e \|x\| \leq C + L_e \|x\|, \\ \exp(-E(G_{\theta}(z))) &\leq \exp(-E(G_{\theta}(0))) \exp(L_e L_b \|z\|) \leq \exp(C) \exp(L_e L_b \|z\|). \end{aligned}$$

Recalling that  $\mathbb{P}$  admits a first order moment and that by Assumption (III),  $\exp(L_e L_b \|z\|)$  is integrable w.r.t.  $\eta$ , it follows by the dominated convergence theorem and by composition of continuous functions that  $\psi \mapsto \mathcal{L}_{\theta}(E_{\psi})$  is continuous in  $\psi_0$ .

To show that  $\theta \mapsto \mathcal{L}_{\theta}(E_{\psi})$  is differentiable in  $\theta$ , we will use the differentiation lemma in (Klenke, 2008, Theorem 6.28). We first fix  $\theta_0$  in the interior of  $\Theta$ , and consider a compact neighborhood  $V$  of  $\theta_0$ . Since  $\theta \mapsto |E(G_{\theta}(0))|$  is continuous on the compact neighborhood  $V$  it admits a maximum value  $C$ ; hence we have using Assumptions (II) and (III) that

$$\exp(-E(G_{\theta}(z))) \leq \exp(-E(G_{\theta}(0))) \exp(L_e L_b \|z\|) \leq \exp(C) \exp(L_e L_b \|z\|).$$

Along with the integrability assumption in Assumption (III), this ensures that  $z \mapsto \exp(-E(G_{\theta}(z)))$  is integrable w.r.t  $\eta$  for all  $\theta$  in  $V$ . We also have that  $\exp(-E(G_{\theta}(z)))$  is differentiable, with gradient given by

$$\nabla_{\theta} \exp(-E(G_{\theta}(z))) = \nabla_x E(G_{\theta}(z)) \nabla_{\theta} G_{\theta}(z) \exp(-E(G_{\theta}(z))).$$

Using that  $E$  is Lipschitz in its inputs and  $G_{\theta}(z)$  is Lipschitz in  $\theta$ , and combining with the previous inequality, it follows that

$$\|\nabla_{\theta} \exp(-E(G_{\theta}(z)))\| \leq \exp(C) L_e a(z) \exp(L_e L_b \|z\|),$$

where  $a(z)$  is the location dependent Lipschitz constant introduced in Assumption (III). The r.h.s. of the above inequality is integrable by Assumption (III) and is independent of  $\theta$  on the neighborhood  $V$ . Thus (Klenke, 2008, Theorem 6.28) applies, and it follows that

$$\nabla_{\theta} \int \exp(-E(G_{\theta_0}(z))) d\eta(z) = \int \nabla_x E(G_{\theta_0}(z)) \nabla_{\theta} G_{\theta_0}(z) \exp(-E(G_{\theta_0}(z))) d\eta(z).$$

We can now directly compute the gradient of  $\mathcal{L}_\theta(E)$ ,

$$\nabla_\theta \mathcal{L}_\theta(E) = \left( \int \exp(-E(G_{\theta_0})) d\eta \right)^{-1} \int \nabla_x E(G_{\theta_0}) \nabla_\theta G_{\theta_0} \exp(-E(G_{\theta_0})) d\eta.$$

Since  $E$  and  $G_\theta$  are Lipschitz in  $x$  and  $\theta$  respectively, it follows that  $\|\nabla_x E(G_{\theta_0}(z))\| \leq L_e$  and  $\|\nabla_\theta G_{\theta_0}(z)\| \leq a(z)$ . Hence, we have

$$\|\nabla_\theta \mathcal{L}_\theta(E)\| \leq L_e \int a(z) (p_{E,\theta} \circ G_\theta(z)) d\eta(z).$$

Finally, Lemma 10 allows us to conclude that  $\|\nabla_\theta \mathcal{L}_\theta(E)\|$  is bounded by a positive constant  $C$  independently from  $\theta$  and  $E$ .  $\square$

**Lemma 10.** *Under Assumptions (II) and (III), there exists a constant  $C$  independent from  $\theta$  and  $E$  such that*

$$\begin{aligned} \int a^i(z) (p_{E,\theta} \circ G_\theta(z)) d\eta(z) &< C, \\ \int b(z) (p_{E,\theta} \circ G_\theta(z)) d\eta(z) &< C, \end{aligned} \tag{24}$$

for  $i = 1, 2$ .

*Proof.* By Lipschitzness of  $E$  and  $G_\theta$ , we have  $\exp(-L_e L_b \|z\|) \leq \exp(E(G_\theta(0)) - E(G_\theta(z))) \leq \exp(L_e L_b \|z\|)$ , thus introducing the factor  $\exp(E(G_{\theta_0}(0)))$  in (24) we get

$$\begin{aligned} \int a^i(z) (p_{E,\theta} \circ G_\theta(z)) d\eta(z) &\leq L_e \left( \int \exp(-L_e L_b \|z\|) d\eta(z) \right)^{-1} \int a^i(z) \exp(L_e L_b \|z\|) d\eta(z), \\ \int b(z) (p_{E,\theta} \circ G_\theta(z)) d\eta(z) &\leq L_e \left( \int \exp(-L_e L_b \|z\|) d\eta(z) \right)^{-1} \int b(z) \exp(L_e L_b \|z\|) d\eta(z). \end{aligned}$$

The r.h.s. of both inequalities is independent of  $\theta$  and  $E$ , and finite by the integrability assumptions in Assumption (III).  $\square$

## C CONVERGENCE RATES OF KALE

In this section, we provide a convergence rate for the estimator in (17) when  $\mathcal{H}$  is an RKHS. The theory remains the same whether  $\mathcal{H}$  contains constants or not. With this choice, the Representer Theorem allows us to reduce the potentially infinite-dimensional optimization problem in (16) to a convex finite-dimensional one. We further restrict ourselves to the *well-specified* case where the density  $r_0$  of  $\mathbb{P}$  w.r.t.  $\mathbb{G}$  is well-defined and belongs to  $\mathcal{H}$ , so that KALE matches the KL. While Nguyen et al. (2010) (Theorem 3) provides a convergence rate of  $1/\sqrt{N}$  for a related  $M$ -estimator, this requires the density  $r_0$  to be lower-bounded by 0 as well as (generally) upper-bounded. This can be quite restrictive if, for instance,  $r_0$  is the density ratio of two gaussians. In Theorem 11, we provide a similar convergence rate for the estimator defined in (17) without requiring  $r_0$  to be bounded. We start by briefly introducing some notations, the working assumptions and the statement of the convergence result in Appendix C.1 and provide the proofs in Appendix C.2.

### C.1 STATEMENT OF THE RESULT

We recall that an RKHS  $\mathcal{H}$  of functions defined on a domain  $\mathcal{X} \subset \mathbb{R}^d$  and with kernel  $k$  is a Hilbert space with dot product  $\langle \cdot, \cdot \rangle$ , such that  $y \mapsto k(x, y)$  belongs to  $\mathcal{H}$  for any  $x \in \mathcal{X}$ , and

$$k(x, y) = \langle k(x, \cdot), k(y, \cdot) \rangle, \quad \forall x, y \in \mathcal{X}.$$

Any function  $h$  in  $\mathcal{H}$  satisfies the reproducing property  $f(x) = \langle f, k(x, \cdot) \rangle$  for any  $x \in \mathcal{X}$ .

Recall that  $\text{KALE}(\mathbb{P} \parallel \mathbb{G})$  is obtained as an optimization problem

$$\text{KALE}(\mathbb{P} \parallel \mathbb{G}) = \sup_{h \in \mathcal{H}} \mathcal{F}(h) \tag{25}$$

where  $\mathcal{F}$  is given by:

$$\mathcal{F}(h) := - \int h d\mathbb{P} - \int \exp(-h) d\mathbb{G} + 1.$$

Since the negative log density ratio  $h_0$  is assumed to belong to  $\mathcal{H}$ , this directly implies that the supremum of  $\mathcal{F}$  is achieved at  $h_0$  and  $\mathcal{F}(h_0) = \text{KALE}(\mathbb{P}||\mathbb{G})$ . We are interested in estimating  $\text{KALE}(\mathbb{P}||\mathbb{G})$  using the empirical distributions  $\hat{\mathbb{P}}$  and  $\hat{\mathbb{G}}$ ,

$$\hat{\mathbb{P}} := \frac{1}{N} \sum_{n=1}^N \delta_{X_n}, \quad \hat{\mathbb{G}} := \frac{1}{N} \sum_{n=1}^N \delta_{Y_n},$$

where  $(X_n)_{1 \leq n \leq N}$  and  $(Y_n)_{1 \leq n \leq N}$  are i.i.d. samples from  $\mathbb{P}$  and  $\mathbb{G}$ . For this purpose we introduce the empirical objective functional,

$$\widehat{\mathcal{F}}(h) := - \int h d\hat{\mathbb{P}} - \int \exp(-h) d\hat{\mathbb{G}} + 1.$$

The proposed estimator is obtained by solving a regularized empirical problem,

$$\sup_{h \in \mathcal{H}} \widehat{\mathcal{F}}(h) - \frac{\lambda}{2} \|h\|^2, \quad (26)$$

with a corresponding population version,

$$\sup_{h \in \mathcal{H}} \mathcal{F}(h) - \frac{\lambda}{2} \|h\|^2. \quad (27)$$

Finally, we introduce  $D(h, \delta)$  and  $\Gamma(h, \delta)$ :

$$D(h, \delta) = \int \delta \exp(-h) d\mathbb{G} - \int \delta d\mathbb{P},$$

$$\Gamma(h, \delta) = - \int \int_0^1 (1-t) \delta^2 \exp(-(h+t\delta)) d\mathbb{G}.$$

The empirical versions of  $D(h, \delta)$  and  $\Gamma(h, \delta)$  are denoted  $\hat{D}(h, \delta)$  and  $\hat{\Gamma}(h, \delta)$ . Later, we will show that  $D(h, \delta)$   $\hat{D}(h, \delta)$  are in fact the gradients of  $\mathcal{F}(h)$  and  $\widehat{\mathcal{F}}(h)$  along the direction  $\delta$ .

We state now the working assumptions:

- (i) The supremum of  $\mathcal{F}$  over  $\mathcal{H}$  is attained at  $h_0$ .
- (ii) The following quantities are finite for some positive  $\epsilon$ :

$$\int \sqrt{k(x, x)} d\mathbb{P}(x),$$

$$\int \sqrt{k(x, x)} \exp((\|h_0\| + \epsilon) \sqrt{k(x, x)}) d\mathbb{G}(x),$$

$$\int k(x, x) \exp((\|h_0\| + \epsilon) \sqrt{k(x, x)}) d\mathbb{G}(x).$$

- (iii) For any  $h \in \mathcal{H}$ , if  $D(h, \delta) = 0$  for all  $\delta$  then  $h = h_0$ .

**Theorem 11.** Fix any  $1 > \eta > 0$ . Under Assumptions (i) to (iii), and provided that  $\lambda = \frac{1}{\sqrt{N}}$ , it holds with probability at least  $1 - 2\eta$  that

$$|\widehat{\mathcal{F}}(\hat{h}) - \mathcal{F}(h_0)| \leq \frac{M'(\eta, h_0)}{\sqrt{N}}$$

for a constant  $M'(\eta, h_0)$  that depends only on  $\eta$  and  $h_0$ .

The assumptions in Theorem 11 essentially state that the kernel associated to the RKHS  $\mathcal{H}$  needs to satisfy some integrability requirements. That is to guarantee that the gradient  $\delta \mapsto \nabla \mathcal{F}(h)(\delta)$  and its empirical version are well-defined and continuous. In addition, the optimality condition  $\nabla \mathcal{F}(h) = 0$  is assumed to characterize the global solution  $h_0$ . This will be the case if the kernel is characteristic [Simon-Gabriel and Scholkopf \(2018\)](#). The proof of Theorem 11, in Appendix C.2, takes advantage of the Hilbert structure of the set  $\mathcal{H}$ , the convexity of the functional  $\mathcal{F}$  and the optimality condition  $\nabla \widehat{\mathcal{F}}(\hat{h}) = \lambda \hat{h}$  of the regularized problem, all of which turn out to be sufficient for controlling the error of (17).

## C.2 PROOFS

We state now the proof of Theorem 11 with subsequent lemmas and propositions.

*Proof of Theorem 11.* We begin with the following inequalities:

$$\frac{\lambda}{2}(\|\hat{h}\|^2 - \|h_0\|^2) \leq \widehat{\mathcal{F}}(\hat{h}) - \widehat{\mathcal{F}}(h_0) \leq \langle \nabla \widehat{\mathcal{F}}(h_0), \hat{h} - h_0 \rangle.$$

The first inequality is by definition of  $\hat{h}$  while the second is obtained by concavity of  $\widehat{\mathcal{F}}$ . For simplicity we write  $\mathcal{B} = \|\hat{h} - h_0\|$  and  $\mathcal{C} = \|\nabla \widehat{\mathcal{F}}(h_0) - \nabla \mathcal{L}(h_0)\|$ . Using Cauchy-Schwarz and triangular inequalities, it is easy to see that

$$-\frac{\lambda}{2}(\mathcal{B}^2 + 2\mathcal{B}\|h_0\|) \leq \widehat{\mathcal{F}}(\hat{h}) - \widehat{\mathcal{F}}(h_0) \leq \mathcal{C}\mathcal{B}.$$

Moreover, by triangular inequality, it holds that

$$\mathcal{B} \leq \|h_\lambda - h_0\| + \|\hat{h} - h_\lambda\|.$$

Lemma 15 ensures that  $\mathcal{A}(\lambda) = \|h_\lambda - h_0\|$  converges to 0 as  $\lambda \rightarrow 0$ . Furthermore, by Proposition 16, we have  $\|\hat{h} - h_\lambda\| \leq \frac{1}{\lambda} \mathcal{D}$  where  $\mathcal{D}(\lambda) = \|\nabla \widehat{\mathcal{F}}(h_\lambda) - \nabla \mathcal{L}(h_\lambda)\|$ . Now choosing  $\lambda = \frac{1}{\sqrt{N}}$  and applying Chebychev inequality in Lemma 12, it follows that for any  $1 > \eta > 0$ , we have with probability greater than  $1 - 2\eta$  that both

$$\mathcal{D}(\lambda) \leq \frac{C(\|h_0\|, \eta)}{\sqrt{N}}, \quad \mathcal{C} \leq \frac{C(\|h_0\|, \eta)}{\sqrt{N}},$$

where  $C(\|h_0\|, \eta)$  is defined in Lemma 12. This allows to conclude that for any  $\eta > 0$ , it holds with probability at least  $1 - 2\eta$  that  $|\widehat{\mathcal{F}}(\hat{h}) - \widehat{\mathcal{F}}(h_0)| \leq \frac{M'(\eta, h_0)}{\sqrt{N}}$  where  $M'(\eta, h_0)$  depends only on  $\eta$  and  $h_0$ .  $\square$

We proceed using the following lemma, which provides an expression for  $D(h, \delta)$  and  $\widehat{D}(h, \delta)$  along with a probabilistic bound:

**Lemma 12.** *Under Assumptions (i) and (ii), for any  $h \in \mathcal{H}$  such that  $\|h\| \leq \|h_0\| + \epsilon$ , there exists  $\mathcal{D}(h)$  in  $\mathcal{H}$  satisfying*

$$D(h, \delta) = \langle \delta, \mathcal{D}(h) \rangle,$$

and for any  $h \in \mathcal{H}$ , there exists  $\widehat{\mathcal{D}}(h)$  satisfying

$$\widehat{D}(h, \delta) = \langle \delta, \widehat{\mathcal{D}}(h) \rangle.$$

Moreover, for any  $0 < \eta < 1$  and any  $h \in \mathcal{H}$  such that  $\|h\| \leq \|h_0\| + \epsilon := M$ , it holds with probability greater than  $1 - \eta$  that

$$\|\mathcal{D}(h) - \widehat{\mathcal{D}}(h)\| \leq \frac{C(M, \eta)}{\sqrt{N}},$$

where  $C(M, \eta)$  depends only on  $M$  and  $\eta$ .

*Proof.* First, we show that  $\delta \mapsto D(h, \delta)$  is a bounded linear operator. Indeed, Assumption (ii) ensures that  $k(x, \cdot)$  and  $k(x, \cdot)\exp(-h(x))$  are Bochner integrable w.r.t.  $\mathbb{P}$  and  $\mathbb{G}$  (Retherford (1978)), hence  $D(h, \delta)$  is obtained as

$$D(h, \delta) := \langle \delta, \mu_{\exp(-h)\mathbb{G}} - \mu_{\mathbb{P}} \rangle,$$

where  $\mu_{\exp(-h)\mathbb{G}} = \int k(x, \cdot)\exp(-h(x))d\mathbb{G}$  and  $\mu_{\mathbb{P}} = \int k(x, \cdot)d\mathbb{P}$ . Defining  $\mathcal{D}(h)$  to be  $= \mu_{\exp(-h)\mathbb{G}} - \mu_{\mathbb{P}}$  leads to the desired result.  $\widehat{\mathcal{D}}(h)$  is simply obtained by taking the empirical version of  $\mathcal{D}(h)$ .

Finally, the probabilistic inequality is a simple consequence of Chebychev's inequality.  $\square$

The next lemma states that  $\mathcal{F}(h)$  and  $\widehat{\mathcal{F}}(h)$  are Frechet differentiable.

**Lemma 13.** *Under Assumptions (i) and (ii),  $h \mapsto \mathcal{F}(h)$  is Frechet differentiable on the open ball of radius  $\|h_0\| + \epsilon$  while  $h \mapsto \widehat{\mathcal{F}}(h)$  is Frechet differentiable on  $\mathcal{H}$ . Their gradients are given by  $\mathcal{D}(h)$  and  $\widehat{\mathcal{D}}(h)$  as defined in Lemma 12,*

$$\nabla \mathcal{F}(h) = \mathcal{D}(h), \quad \nabla \widehat{\mathcal{F}}(h) = \widehat{\mathcal{D}}(h)$$

*Proof.* The empirical functional  $\widehat{\mathcal{F}}(h)$  is differentiable since it is a finite sum of differentiable functions, and its gradient is simply given by  $\widehat{\mathcal{D}}(h)$ . For the population functional, we use second order Taylor expansion of exp with integral remainder, which gives

$$\mathcal{F}(h + \delta) = \mathcal{F}(h) - D(h, \delta) + \Gamma(h, \delta).$$

By Assumption (ii) we know that  $\frac{\Gamma(h, \delta)}{\|\delta\|}$  converges to 0 as soon as  $\|\delta\| \rightarrow 0$ . This allows to directly conclude that  $\mathcal{F}$  is Frechet differentiable, with differential given by  $\delta \mapsto D(h, \delta)$ . By Lemma 12, we conclude the existence of a gradient  $\nabla \mathcal{F}(h)$  which is in fact given by  $\nabla \mathcal{F}(h) = \mathcal{D}(h)$ .  $\square$

From now on, we will only use the notation  $\nabla \mathcal{F}(h)$  and  $\nabla \widehat{\mathcal{F}}(h)$  to refer to the gradients of  $\mathcal{F}(h)$  and  $\widehat{\mathcal{F}}(h)$ . The following lemma states that (26) and (27) have a unique global optimum, and gives a first order optimality condition.

**Lemma 14.** *The problems (26) and (27) admit unique global solutions  $\hat{h}$  and  $h_\lambda$  in  $\mathcal{H}$ . Moreover, the following first order optimality conditions hold:*

$$\lambda \hat{h} = \nabla \widehat{\mathcal{F}}(\hat{h}), \quad \lambda h_\lambda = \nabla \mathcal{F}(h_\lambda).$$

*Proof.* For (26), existence and uniqueness of a minimizer  $\hat{h}$  is a simple consequence of continuity and strong concavity of the regularized objective. We now show the existence result for (27). Let's introduce  $\mathcal{G}_\lambda(h) = -\mathcal{F}(h) + \frac{\lambda}{2} \|h\|^2$  for simplicity. Uniqueness is a consequence of the strong convexity of  $\mathcal{G}_\lambda$ . For the existence, consider a sequence of elements  $f_k \in \mathcal{H}$  such that  $\mathcal{G}_\lambda(f_k) \rightarrow \inf_{h \in \mathcal{H}} \mathcal{G}_\lambda(h)$ . If  $h_0$  is not the global solution, then it must hold for  $k$  large enough that  $\mathcal{G}_\lambda(f_k) \leq \mathcal{G}_\lambda(h_0)$ . We also know that  $\mathcal{F}(f_k) \leq \mathcal{F}(h_0)$ , hence, it is easy to see that  $\|f_k\| \leq \|h_0\|$  for  $k$  large enough. This implies that  $f_k$  is a bounded sequence, therefore it admits a weakly convergent sub-sequence by weak compactness. Without loss of generality we assume that  $f_k$  weakly converges to some element  $h_\lambda \in \mathcal{H}$  and that  $\|f_k\| \leq \|h_0\|$ . Hence,  $\|h_\lambda\| \leq \liminf_k \|f_k\| \leq \|h_0\|$ . Recall now that by definition of weak convergence, we have  $f_k(x) \rightarrow_k h_\lambda(x)$  for all  $x \in \mathcal{X}$ . By Assumption (ii), we can apply the dominated convergence theorem to ensure that  $\mathcal{F}(f_k) \rightarrow \mathcal{F}(h_\lambda)$ . Taking the limit of  $\mathcal{G}_\lambda f_k$ , the following inequality holds:

$$\sup_{h \in \mathcal{H}} \mathcal{G}_\lambda(h) = \limsup_k \mathcal{G}_\lambda(f_k) \leq \mathcal{G}_\lambda(h_\lambda).$$

Finally, by Lemma 13 we know that  $\mathcal{F}$  is Frechet differentiable, hence we can use Ekeland and Témam (1999) (Proposition 2.1) to conclude that  $\nabla \mathcal{F}(h_\lambda) = \lambda h_\lambda$ . We use exactly the same arguments for (26).  $\square$

Next, we show that  $h_\lambda$  converges towards  $h_0$  in  $\mathcal{H}$ .

**Lemma 15.** *Under Assumptions (i) to (iii) it holds that:*

$$\mathcal{A}(\lambda) := \|h_\lambda - h_0\| \rightarrow 0.$$

*Proof.* We will first prove that  $h_\lambda$  converges weakly towards  $h_0$ , and then conclude that it must also converge strongly. We start with the following inequalities:

$$0 \geq \mathcal{F}(h_\lambda) - \mathcal{F}(h_0) \geq \frac{\lambda}{2} (\|h_\lambda\|^2 - \|h_0\|^2).$$

These are simple consequences of the definitions of  $h_\lambda$  and  $h_0$  as optimal solutions to (25) and (26). This implies that  $\|h_\lambda\|$  is always bounded by  $\|h_0\|$ . Consider now an arbitrary sequence  $(\lambda_m)_{m \geq 0}$

converging to 0. Since  $\|h_{\lambda_m}\|$  is bounded by  $\|h_0\|$ , it follows by weak-compactness of balls in  $\mathcal{H}$  that  $h_{\lambda_m}$  admits a weakly convergent sub-sequence. Without loss of generality we can assume that  $h_{\lambda_m}$  is itself weakly converging towards an element  $h^*$ . We will show now that  $h^*$  must be equal to  $h_0$ . Indeed, by optimality of  $h_{\lambda_m}$ , it must hold that

$$\lambda_m h_{\lambda_m} = \nabla \mathcal{F}(h_m).$$

This implies that  $\nabla \mathcal{F}(h_m)$  converges weakly to 0. On the other hand, by Assumption (ii), we can conclude that  $\nabla \mathcal{F}(h_m)$  must also converge weakly towards  $\nabla \mathcal{F}(h^*)$ , hence  $\nabla \mathcal{F}(h^*) = 0$ . Finally by Assumption (iii) we know that  $h_0$  is the unique solution to the equation  $\nabla \mathcal{F}(h) = 0$ , hence  $h^* = h_0$ . We have shown so far that any subsequence of  $h_{\lambda_m}$  that converges weakly, must converge weakly towards  $h_0$ . This allows to conclude that  $h_{\lambda_m}$  actually converges weakly towards  $h_0$ . Moreover, we also have by definition of weak convergence that:

$$\|h_0\| \leq \liminf_{m \rightarrow \infty} \|h_{\lambda_m}\|.$$

Recalling now that  $\|h_{\lambda_m}\| \leq \|h_0\|$  it follows that  $\|h_{\lambda_m}\|$  converges towards  $\|h_0\|$ . Hence, we have the following two properties:

- $h_{\lambda_m}$  converges weakly towards  $h_0$ ,
- $\|h_{\lambda_m}\|$  converges towards  $\|h_0\|$ .

This allows to directly conclude that  $\|h_{\lambda_m} - h_0\|$  converges to 0. □

**Proposition 16.** *We have that:*

$$\|\hat{h} - h_\lambda\| \leq \frac{1}{\lambda} \|\nabla \hat{\mathcal{F}}(h_\lambda) - \nabla \mathcal{F}(h_\lambda)\|$$

*Proof.* By definition of  $\hat{h}$  and  $h_\lambda$  the following optimality conditions hold:

$$\lambda \hat{h} = \nabla \hat{\mathcal{F}}(\hat{h}), \quad \lambda h_\lambda = \nabla \mathcal{F}(h_\lambda).$$

We can then simply write:

$$\lambda(\hat{h} - h_\lambda) - (\nabla \hat{\mathcal{F}}(\hat{h}) - \nabla \hat{\mathcal{F}}(h_\lambda)) = \nabla \hat{\mathcal{F}}(h_\lambda) - \nabla \mathcal{F}(h_\lambda).$$

Now introducing  $\delta := \hat{h} - h_\lambda$  and  $E := \nabla \hat{\mathcal{F}}(\hat{h}) - \nabla \hat{\mathcal{F}}(h_\lambda)$  for simplicity and taking the squared norm of the above equation, it follows that

$$\lambda^2 \|\delta\|^2 + \|E\|^2 - 2\lambda \langle \delta, E \rangle = \|\nabla \hat{\mathcal{F}}(h_\lambda) - \nabla \mathcal{F}(h_\lambda)\|^2.$$

By concavity of  $\hat{\mathcal{F}}$  on  $\mathcal{H}$  we know that  $-\langle \hat{h} - h_\lambda, E \rangle \geq 0$ . Therefore:

$$\lambda^2 \|\hat{h} - h_\lambda\|^2 \leq \|\nabla \hat{\mathcal{F}}(h_\lambda) - \nabla \mathcal{F}(h_\lambda)\|^2.$$

□

### C.3 ESTIMATING KALE WITH ENERGIES IN AN RKHS

Recall the expression of the empirical objective:

$$\hat{F}(h+c) = -\langle h, \hat{\mu}_{\mathbb{P}} \rangle - c - \frac{1}{N} \sum_{i=1}^N \exp(-h(Y_i) - c) + 1 - \frac{\lambda}{2} \|h\|^2 \quad (28)$$

The representer theorem allows to express the optimal  $h^*$  in the following form:

$$h^* = \alpha \hat{\mu}_{\mathbb{P}} + \sum_{i=1}^N \beta_i k(Y_i, \cdot).$$

Plugging in the above expression in (28), and introducing the matrix  $K$  and vector  $m$  with entries given by  $K(Y_i, Y_j)$  and  $m_i = \hat{\mu}_{\mathbb{P}}(Y_i)$  it follows:

$$\mathcal{L}(\alpha, \beta, c) = -\alpha \|\hat{\mu}_{\mathbb{P}}\|^2 - \beta^\top m - c - \frac{1}{N} \mathbb{1}^\top \exp(-(\alpha m + K\beta + c)) - \frac{\lambda}{2} (\alpha^2 \|\hat{\mu}_{\mathbb{P}}\|^2 + \beta^\top K\beta + 2\alpha K\beta). \quad (29)$$

The optimal values for  $\alpha$  and  $c$  for a given  $\beta$  are:

$$\alpha^* = -\frac{1}{\lambda} \quad c(\beta) = \log(\mathbb{1}^\top \exp(\frac{1}{\lambda} m - K\beta)) - \log N$$

Using those optimal solution in (29) gives another concave objective in  $\beta$ :

$$\mathcal{L}(\beta) := -\log(\mathbb{1}^\top S(\beta)) - \frac{\lambda}{2} \beta^\top K\beta$$

with  $S(\beta)$  given by  $S(\beta) = \exp(\frac{m}{\lambda} - K\beta)$ . This can be optimized iteratively using Newton's method. We provide the expression for the gradient:

$$\begin{aligned} \nabla \mathcal{L}(\beta) &:= -K(\lambda\beta - \tilde{S}(\beta)) \\ H\mathcal{L}(\beta) &:= -(\lambda K + K(\text{diag}(\tilde{S}(\beta)) - \tilde{S}(\beta)\tilde{S}(\beta)^\top)K) \end{aligned}$$

The matrix  $K$  gets simplified when performing newton's updates:

$$\beta_{k+1} = \beta_k - \gamma(\lambda I + E(\beta_k)K)^{-1}(\lambda\beta_k - \tilde{S}(\beta_k))$$

with  $E(\beta) = (\text{diag}(\tilde{S}(\beta)) - \tilde{S}(\beta)\tilde{S}(\beta)^\top)$

where we introduced the normalized vector  $\tilde{S}(\beta) = \frac{1}{\mathbb{1}^\top S(\beta)} S(\beta)$ .

The optimal coefficients  $\alpha$  and  $\beta$  are obtained by solving the following maximization problem:

$$(\alpha^*, \beta^*) = \underset{\alpha, \beta}{\operatorname{argmax}}$$

## D IMAGE GENERATION

Figures 3 and 4 show sample trajectories using Algorithm 3 with no friction  $\gamma = 0$  for the 4 datasets. It is clear that along the same MCMC chain, several image modes are explored. We also notice the transition from a mode to another happens almost at the same time for all chains and corresponds to the gray images. This is unlike Langevin or when the friction coefficient  $\gamma$  is large as in Figure 5. In that case each chain remains within the same mode.

Table 4 shows further comparisons with other methods on Cifar10 and ImageNet 32x32.

## E DENSITY ESTIMATION

Figure Figure 7 (left) shows the error in the estimation of the log-partition function using both methods (KALE-DV and KALE-F). KALE-DV estimates the negative log-likelihood on each batch of size 100 and therefore has much more variance than KALE-F which maintains the amortized estimator of the log-partition function.

Figure Figure 7 (right) shows the evolution of the negative log-likelihood (NLL) on both training and test sets per epochs for RedWine and Whitewine datasets. The error decreases steadily in the case of KALE-DV and KALE-F while the error gap between the training and test set remains controlled. Larger gaps are observed for both direct maximum likelihood estimation and Contrastive divergence although the training NLL tends to decrease faster than for KALE.

## F ALGORITHMS

**Estimating the variational parameter.** Optimizing (7) exactly over  $A$  yields (6), with the optimal  $A$  equal to  $\tilde{A} = \log(\frac{1}{M} \sum_{m=1}^M \exp(-E(Y_m)))$ . However, to maintain an amortized estimator of the

| Model                              | FID          |
|------------------------------------|--------------|
| <b>Cifar10 Unsupervised</b>        |              |
| PixelCNN Oord et al. (2016)        | 65.93        |
| PixelIQN Ostrovski et al. (2018)   | 49.46        |
| EBM Radford et al. (2015)          | 38.2         |
| WGAN-GP Gulrajani et al. (2017)    | 36.4         |
| NCSN Ho and Ermon (2016)           | 25.32        |
| SNGAN Miyato et al. (2018)         | 21.7         |
| MoLM Ravuri et al. (2018)          | 18.9         |
| GEbm                               | -            |
| <b>Cifar10 Supervised</b>          |              |
| BigGAN Donahue and Simonyan (2019) | 14.73        |
| SAGAN Zenke et al. (2017)          | 13.4         |
| <b>ImageNet Conditional</b>        |              |
| PixelCNN                           | 33.27        |
| PixelIQN                           | 22.99        |
| EBM                                | 14.31        |
| <b>ImageNet Supervised</b>         |              |
| SNGAN                              | 20.50        |
| GEbm                               | <b>13.94</b> |

Table 4: FID scores on ImageNet and CIFAR-10.

log-partition we propose to optimize (7) iteratively using second order updates:

$$A_{k+1} = A_k - \lambda(\exp(A_k - \tilde{A}_{k+1}) - 1), \quad A_0 = \tilde{A}_0 \quad (30)$$

where  $\lambda$  is a learning rate and  $\tilde{A}_{k+1}$  is the empirical log-partition function estimated from a batch of new samples. By leveraging updates from previous iterations,  $A$  can yield much more accurate estimates of the log-partition function as confirmed empirically in Figure 7 of Appendix E.

**Tempered GEbm.** It can be preferable to sample from a *tempered* version of the model by rescaling the energy  $E$  by an *inverse temperature* parameter  $\beta$ , thus effectively sampling from  $\mathbb{Q}$ . *High temperature* regimes ( $\beta \rightarrow 0$ ) recover the base model  $\mathbb{G}$  while *low temperature* regimes ( $\beta \rightarrow \infty$ ) essentially sample from minima of the energy  $E$ . As shown in Section 6, low temperatures tend to produce better sample quality for natural image generation tasks.

**Training** In Algorithm 1, we describe the general algorithm for training a GEbm which alternates between gradient steps on the energy and the generator. An additional regularization, denoted by  $I(\psi)$  is used to ensure conditions of Proposition 3 and Theorem 4 hold.  $I(\psi)$  can include  $L_2$  regularization over the parameters  $\psi$ , a gradient penalty as in Gulrajani et al. (2017) or Spectral normalization Miyato et al. (2018). The energy can be trained either using the estimator in (6) (KALE-DV) or the one in (7) (KALE-F) depending on the variable  $\mathcal{C}$ .

**Sampling** In Algorithm 3, we describe the MCMC sampler proposed in Sachs et al. (2017) which is a time discretization of (12).

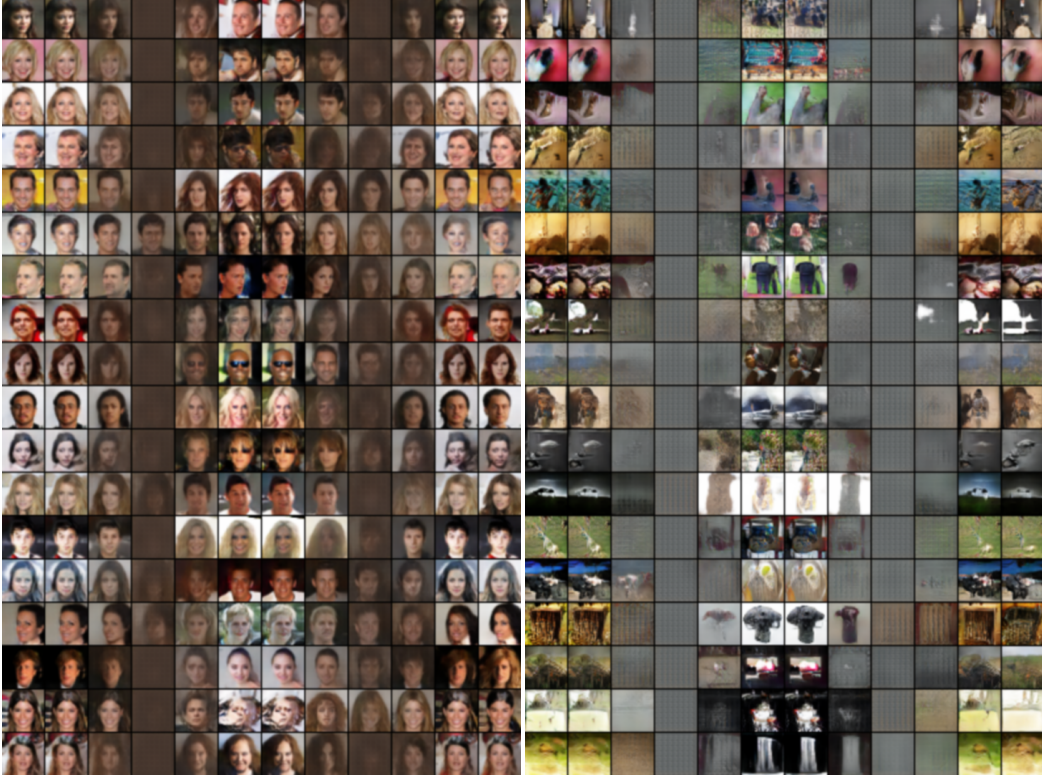

Figure 3: Samples from the GEBM at different stages of sampling using Algorithm 3 and inverse temperature  $\beta = 1$ , on CelebA (Left), Imagenet (Right). Each row represents a sampling trajectory from early stages (leftmost images) to later stages (rightmost images).

---

**Algorithm 2** Overdamped Langevin Algorithm
 

---

```

1: Input  $\lambda, \gamma, u, \eta, E, G$ 
2: Output  $X_T$ 
3:  $Z_0 \sim \eta$  // Sample Initial latent from  $\eta$ .
4: for  $t=0, \dots, T$  do
5:    $Y_{t+1} \leftarrow \nabla_z \log \eta(Z_t) - \nabla_z E \circ B(Z_t)$  // Evaluating  $\nabla_z \log(\nu(Z_{t+1}))$  using (3).
6:    $W_{t+1} \sim \mathcal{N}(0, I)$  // Sample standard gaussian noise
7:    $Z_{t+1} \leftarrow Z_t + \lambda Y_{t+1} + \sqrt{2\lambda} W_{t+1}$ 
8: end for
9:  $X_T \leftarrow G(Z_T)$ 

```

---

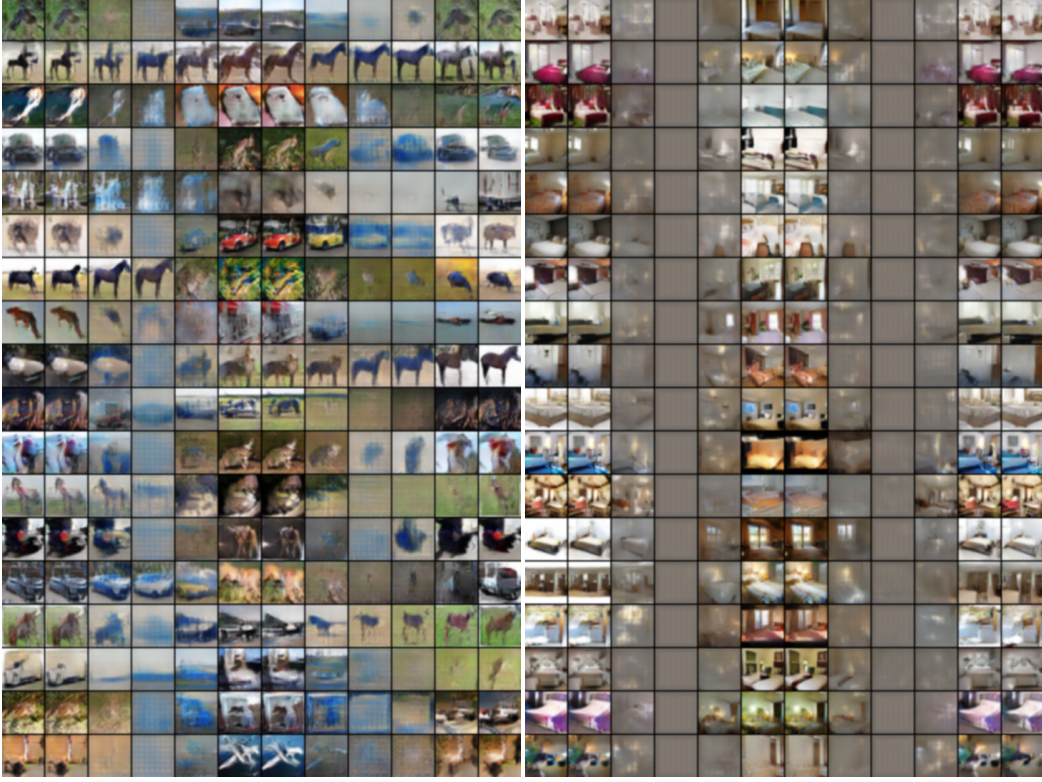

Figure 4: Samples from the GEBM at different stages of sampling using Algorithm 3 and inverse temperature  $\beta = 1$ , on Cifar10 and LSUN (Right). Each row represents a sampling trajectory from early stages (leftmost images) to later stages (rightmost images).

---

**Algorithm 3** Kinetic Langevin Algorithm

---

```

1: Input  $\lambda, \gamma, u, \eta, E, G$ 
2: Output  $X_T$ 
3:  $Z_0 \sim \eta$  // Sample Initial latent from  $\eta$ .
4: for  $t = 0, \dots, T$  do
5:    $Z_{t+1} \leftarrow Z_t + \frac{\lambda}{2} V_t$ 
6:    $Y_{t+1} \leftarrow \nabla_z \log \eta(Z_{t+1}) - \nabla_z E \circ B(Z_{t+1})$  // Evaluating  $\nabla_z \log(\nu(Z_{t+1}))$  using (3).
7:    $V_{t+1} \leftarrow V_t + \frac{u\lambda}{2} Y_{t+1}$ 
8:    $W_{t+1} \sim \mathcal{N}(0, I)$  // Sample standard gaussian noise
9:    $\tilde{V}_{t+1} \leftarrow \exp(-\gamma\lambda) V_{t+\frac{1}{2}} + \sqrt{u(1 - \exp(-2\gamma\lambda))} W_{t+1}$ 
10:   $V_{t+1} \leftarrow \tilde{V}_{t+1} + \frac{u\lambda}{2} Y_{t+1}$ 
11:   $Z_{t+1} \leftarrow Z_{t+1} + \frac{\lambda}{2} V_{t+1}$ 
12: end for
13:  $X_T \leftarrow G(Z_T)$ 

```

---

## G EXPERIMENTAL DETAILS

In all experiments, we use **regularization** which is a combination of  $L_2$  norm and a variant of the gradient penalty Gulrajani et al. (2017). For the image generation tasks, we also employ spectral normalization Miyato et al. (2018). This is to ensure that the conditions in Proposition 3 and Theorem 4 hold. We **pre-condition** the gradient as proposed in Simsekli et al. (2020) to stabilize training, and to avoid taking large noisy gradient steps due to the exponential terms in (6) and (7). We also use the second-order updates in (30) for the variational constant  $c$  whenever it is learned.

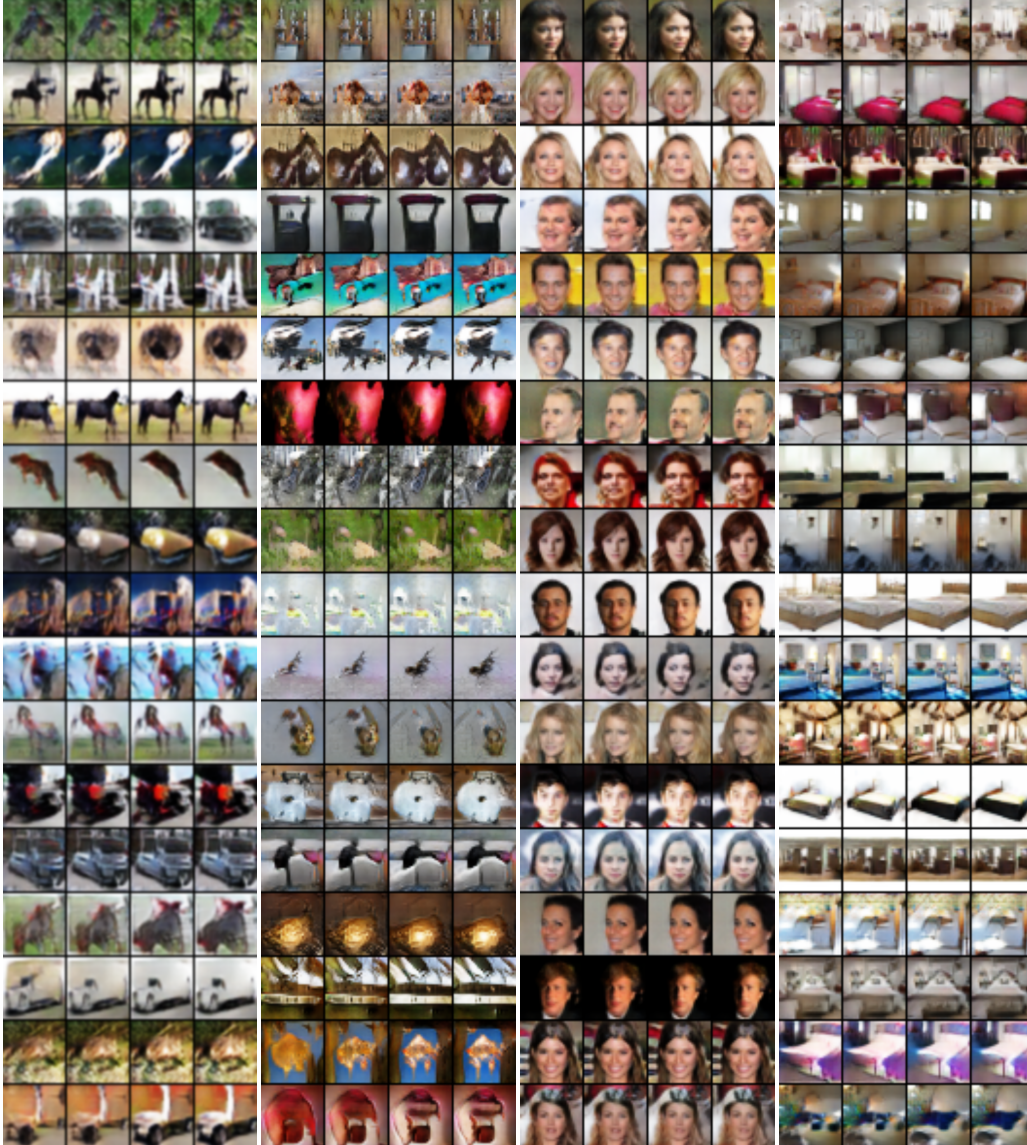

Figure 5: Samples from the tempered GEBM at different stages of sampling using langevin and inverse temperature  $\beta = 100$ , on Cifar10 (Left), Imagenet (Middle-left), CelebA (Middle-Right) and LSUN (Right). Each row represents a sampling trajectory from early stages (leftmost images) to later stages (rightmost images).

### G.1 IMAGE GENERATION

**Training:** We train both base and energy by alternating 5 gradient steps to learn the energy vs 1 gradient step to learn the base. For the first two gradient iterations and after every 500 gradient iterations on base, we train the energy for 100 gradient steps instead of 5. We then train the model up to 150000 gradient iterations on the base using a batch-size of 128 and Adam optimizer with initial learning rate of  $10^{-4}$  and parameters (0.5,.999) for both energy and base.

**Scheduler:** We decrease the learning rate using a scheduler that monitors the FID score in a similar way as in [Bińkowski et al. \(2018\)](#); [Arbel et al. \(2018\)](#). More precisely, every 2000 gradient iterations on the base, we evaluate the FID score on the training set using 50000 generated samples from the base and check if the current score is larger than the score 20000 iterations before. The learning rate is decreased by a factor of 0.8 if the FID score fails to decrease for 3 consecutive times.

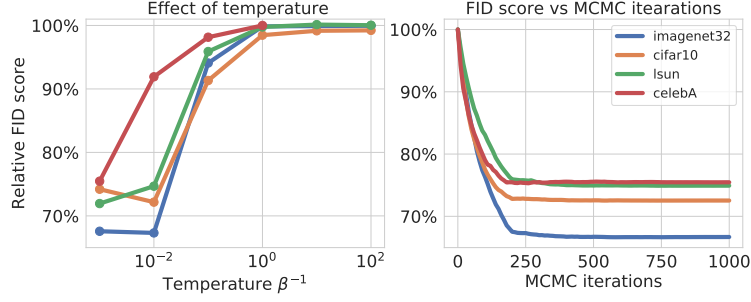

Figure 6: Relative FID score: ratio between FID score of the GEBM  $Q_{G,E}$  and its base  $G$ . (Left) Evolution of the ratio for increasing temperature on the 4 datasets after 1000 iterations of (12). (Right) Evolution of the same ratio during MCMC iteration using (12).

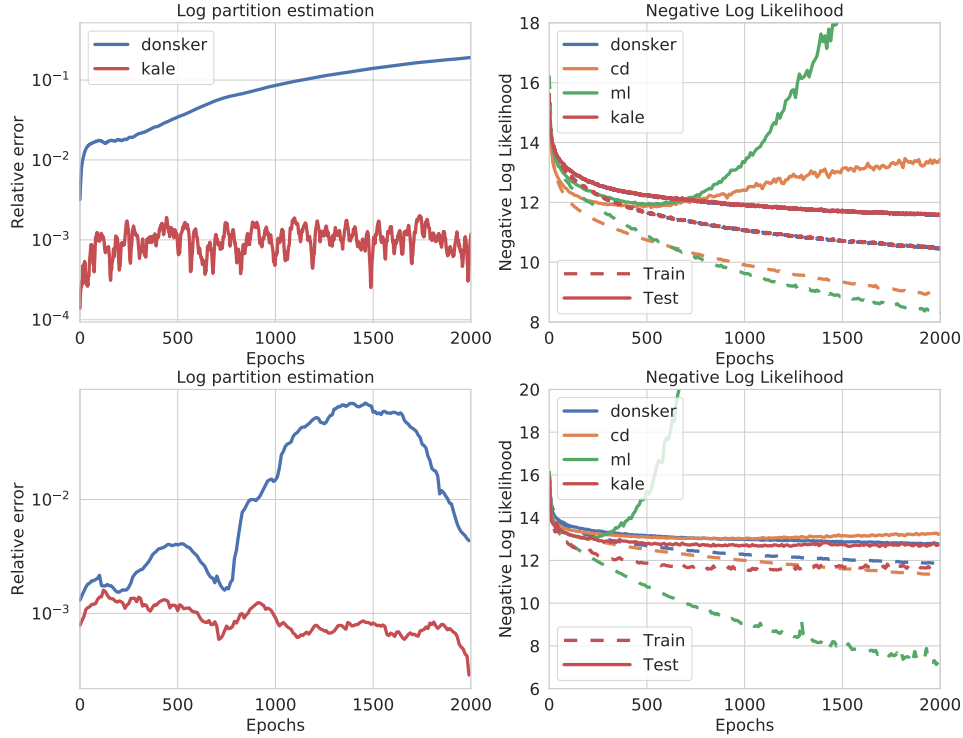

Figure 7: (Left): Relative error  $\frac{|\hat{c}-c^*|}{|\hat{c}|+|c^*|}$  on the estimation of the ground truth log-partition function  $c^*$  by  $\hat{c}$  using either KALE-DV or KALE-F vs training Epochs on RedWine (Top) and WhiteWine (Bottom) datasets. (Right): Negative log likelihood vs training epochs on both training and test set for 4 different learning methods (KALE-DV, KALE-F, CD and ML) on RedWine dataset.

**Sampling:** For (DOT) Tanaka (2019), we use the following objective:

$$z \mapsto \|z - z_y + \epsilon\| + \frac{1}{k_{eff}} E \circ G(z) \quad (31)$$

where  $z_y$  is sampled from a standard gaussian,  $\epsilon$  is a perturbation meant to stabilize sampling and  $k_{eff}$  is the estimated Lipschitz constant of  $E \circ B$ . Note that (31) uses a flipped sign for the  $E \circ B$  compared to Tanaka (2019). This is because  $E$  plays the role of  $-D$  where  $D$  is the discriminator in Tanaka (2019). Introducing the minus sign in (31) leads to a degradation in performance. We perform 1000 gradient iterations with a step-size of 0.0001 which is also decreased by a factor of 10 every 200 iterations as done for the proposed method. As suggested by the authors of Tanaka (2019) we perform

the following projection for the gradient before applying it:

$$g \leftarrow g - \frac{(g^\top z)}{\sqrt{q}} z.$$

We set the perturbation  $\epsilon$  to 0.001 and  $k_{eff}$  to 1 which was also shown in Tanaka (2019) to perform well. In fact, we found that estimating the Lipschitz constant by taking the maximum value of  $\|\nabla E \circ G(z)\|$  over 1000 latent samples according to  $\eta$  lead to higher values for  $k_{eff}$ : (Cifar10: 9.4, CelebA: 7.2, ImageNet: 4.9, Lsun: 3.8). However, those higher values did not perform as well as setting  $k_{eff} = 1$ .

For (IHM) Turner et al. (2019) we simply run the MCMC chain for 1000 iterations.

## G.2 DENSITY ESTIMATION

**Pre-processing** We use code and pre-processing steps from Wenliang et al. (2019) which we describe here for completeness. For RedWine and WhiteWine, we added uniform noise with support equal to the median distances between two adjacent values. That is to avoid instabilities due to the quantization of the datasets. For Hepmass and MiniBoone, we removed ill-conditioned dimensions as also done in Papamakarios et al. (2017). We split all datasets, except HepMass into three splits. The test split consists of 10% of the total data. For the validation set, we use 10% of the remaining data with an upper limit of 1000 to reduce the cost of validation at each iteration. For HepMass, we used the sample splitting as done in Papamakarios et al. (2017). Finally, the data is whitened before fitting and the whitening matrix was computed on at most 10000 data points.

**Regularization:** We set the regularization parameter to 0.1 and use a combination of  $L_2$  norm and a variant of the gradient penalty Gulrajani et al. (2017):

$$I(\psi)^2 = \frac{1}{d_\psi} \|\psi\|^2 + \mathbb{E} [\|\nabla_x f_\psi(\tilde{X})\|^2]$$

**Network Architecture.** For both base and energy, we used an NVP Dinh et al. (2016) with 5 NVP layers each consisting of a shifting and scaling layer with two hidden layers of 100 neurons. We do not use Batch-normalization.

**Training:** In all cases we use Adam optimizer with learning rate of 0.001 and momentum parameters (0.5, 0.9). For both KALE-DV and KALE-F, we used a batch-size of 100 data samples vs 2000 generated samples from the base in order to reduce the variance of the estimation of the energy. We alternate 50 gradient steps on the energy vs 1 step on the base and further perform 50 additional steps on the energy for the first two gradient iterations and after every 500 gradient iterations on base. For Contrastive divergence, each training step is performed by first producing 100 samples from the model using 100 Langevin iterations with a step-size of  $10^{-2}$  and starting from a batch of 100 data-samples. The resulting samples are then used to estimate the gradient of the of the loss.

For (CD), we used 100 Langevin iterations for each learning step to sample from the EBM. This translates into an improved performance at the expense of increased computational cost compared to the other methods. All methods are trained for 2000 epochs with batch-size of 100 (1000 on Hepmass and Miniboone datasets) and fixed learning rate 0.001, which was sufficient for convergence.
